1 **Antioxidant nanozyme counteracts HIV-1 by modulating intracellular redox**  
2 **potential**

3  
4 Shalini Singh<sup>1, 2</sup>, Sourav Ghosh<sup>3</sup>, Virender Kumar Pal<sup>1, 2</sup>, MohamedHusen Munshi<sup>2</sup>,  
5 Raju S Rajmani<sup>2</sup>, Govindasamy Mugesh<sup>3\*</sup>, and Amit Singh<sup>1, 2\*</sup>  
6

7 <sup>1</sup>Department of Microbiology and Cell Biology, Indian Institute of Science, Bangalore-  
8 560012, India

9 <sup>2</sup>Centre for Infectious Disease Research (CIDR), Indian Institute of Science,  
10 Bangalore 560012, India

11 <sup>3</sup>Department of Inorganic and Physical Chemistry, Indian Institute of Science,  
12 Bangalore 560012, India.

13

14

15

16 **\* Correspondence:**

17 Amit Singh ([asingh@iisc.ac.in](mailto:asingh@iisc.ac.in)) and Govindasamy Mugesh ([mugesh@iisc.ac.in](mailto:mugesh@iisc.ac.in))

18

19 **Classification**

20 Major – Biological sciences; Minor – Applied biological sciences

21 **Keywords**

22 Nanozymes, HIV, glutathione peroxidase, glutathione, latency

23

24

25

26

27

28 **Abstract**

29 Reactive oxygen species (ROS) regulates the proliferation of human  
30 immunodeficiency virus (HIV-1) and *Mycobacterium tuberculosis* (*Mtb*) inside the  
31 infected immune cells. However, the application of this knowledge to develop  
32 therapeutic strategies remained unsuccessful due to unfavorable consequences of  
33 manipulating cellular antioxidant systems that respond to ROS. Here, we show that  
34 vanadium pentoxide ( $V_2O_5$ ) nanosheets functionally mimic the activity of natural  
35 glutathione peroxidase (GPX) to mitigate ROS associated with HIV-1 infection  
36 without triggering detrimental changes in cellular physiology. Using genetic reporters  
37 of glutathione (GSH) redox potential ( $E_{GSH}$ ; Grx1-roGFP2) and  $H_2O_2$  (Orp1-roGFP2),  
38 we showed that  $V_2O_5$ -nanosheets catalyze GSH-dependent neutralization of ROS in  
39 HIV-1 infected cells. Notably,  $V_2O_5$ -nanosheets uniformly blocked HIV-1 reactivation,  
40 multiplication, and impaired survival of drug-resistant *Mtb* during HIV-TB co-infection.  
41 Mechanistically,  $V_2O_5$ -nanosheets suppressed HIV-1 by affecting the expression of  
42 pathways coordinating redox balance, virus transactivation (e.g., NF- $\kappa$ B and FOS),  
43 inflammation, and apoptosis. Importantly, a combination of  $V_2O_5$ -nanosheets with a  
44 pharmacological inhibitor of NF- $\kappa$ B (BAY11-7082) abrogated activation of HIV-1 from  
45 latency. Lastly,  $V_2O_5$ -nanosheets counteracted ROS, disease pathophysiology, and  
46 virus expression in HIV-1 transgenic mice. Our data successfully revealed the  
47 usefulness of  $V_2O_5$ -nanosheets against human pathogens and suggest nanozymes  
48 as future platforms to develop interventions against infectious diseases.

49

50

51

52

53 **Significance Statement**

54 Redox stress, such as those caused by the deregulation of the antioxidant  
55 glutathione, promotes the multiplication of human immunodeficiency virus-1 (HIV-1)  
56 and *Mycobacterium tuberculosis* (*Mtb*). Here we present a vanadium pentoxide  
57 ( $V_2O_5$ )-based antioxidant nanozyme that targets cells infected with HIV-1. The  
58 nanozyme, by mimicking the activity of glutathione peroxidase, reprograms redox  
59 signaling to subvert HIV-1 from monocytes, lymphocytes, and HIV-1 transgenic mice.  
60 Treatment with nanozyme bolsters the antiviral potential of immune cells by reducing  
61 the expression of genes involved in virus activation, inflammation, and apoptosis.  
62 The nanozyme also inhibited the proliferation of *Mtb*, which is a major cause of  
63 lethality in HIV patients. These  $V_2O_5$ -based nanozymes may be applied to numerous  
64 human pathogens where redox signaling contributes to disease progression.

65

66

67

68

69

## 70 **Introduction**

71 Nanomaterials with intrinsic enzyme-mimetic properties (nanozymes) have  
72 been explored as low-cost alternatives to natural enzymes (1). The application of  
73 these nanomaterials was largely restricted to industries for chemical synthesis,  
74 detection of biomolecules, and bioremediation (1, 2). While largely ignored by the  
75 biomedical community, recent studies provide evidence for the clinical importance of  
76 artificial nanozymes *in vivo* (3). For example, ceria-based nanoparticles (NPs) mimic  
77 superoxide dismutase (SOD) activity and exhibit neuroprotection and reduced  
78 inflammation (4, 5). Similarly, iron oxide-based nanoparticles mimic peroxidase-like  
79 activity and protect from bacterial biofilms associated with oral infection (6).  
80 Moreover, ferumoxytol, an FDA approved iron-oxide nanoparticle has been shown to  
81 inhibit tumor growth in mice (7). Recently, we reported that vanadium pentoxide  
82 ( $V_2O_5$ ) nanomaterial could protect mammalian cells from oxidative damage and  
83 apoptosis by glutathione peroxidase (GPX)-like activity in the presence of cellular  
84 antioxidant glutathione (GSH) (8). These findings indicate the importance of  
85 nanozymes mimicking the activity of natural antioxidant enzymes for biomedical  
86 applications.

87

88 Our particular interest is to apply antioxidant nanozymes in oxidative stress  
89 linked human infections where therapeutic options are inadequate. In this context,  
90 oxidative stress is central to the infection caused by one of the major global  
91 pathogen human immuno-deficiency virus (HIV-1; the causative agent of the  
92 acquired immuno-deficiency syndrome [AIDS]) (9). A major barrier to curing HIV-1  
93 infection is latency, wherein the infected cells harbor the intact viral genome that is  
94 replication-competent but transcriptionally silent. Interestingly, oxidative stress is

95 known to reactivate HIV-1 from latent reservoirs via NF- $\kappa$ B directed transcriptional  
96 activation of the viral long terminal repeat (LTR) (10, 11). Further studies linking  
97 oxidative stress with HIV-1 infection demonstrate variations in GSH levels in infected  
98 cells and tissues (12-14). Using a non-invasive biosensor of GSH redox potential  
99 ( $E_{GSH}$ ; Grx1-roGFP2), we discovered that reductive  $E_{GSH}$  sustains viral latency,  
100 whereas a marginal oxidative shift in  $E_{GSH}$  promotes HIV-1 reactivation (15).

101

102 In addition to GSH, decreased expression levels of host GPXs are associated  
103 with HIV-1 reactivation and replication (15, 16). The HIV-1 genome also encodes a  
104 fully functional GPX (HIV-1 vGPX) module (17), which protects cells from reactive  
105 oxygen species (ROS) induced apoptosis and possibly helps HIV-1 to maintain  
106 latency (17). Consistent with this, majority of the viral isolates from individuals  
107 naturally competent to maintain HIV-1 in a latent state (long-term non-progressors  
108 [LTNPs]) possess a functional vGPX gene (18). In contrast, HIV-1 strains from the  
109 patients with actively replicating virus contain a non-functional vGPX (18). Since  
110 LTNPs serve as a natural model for slowing progression of HIV in humans, the  
111 association of functional vGPX with these individuals reinforces the physiological  
112 importance of the GSH/GPX axis in HIV-1 latency. Despite these observations,  
113 efforts to mitigate oxidative stress for subverting HIV-1 reactivation by either  
114 supplementation of GSH precursor (N-acetylcysteine [NAC]) or activation/over-  
115 expression of GPXs yielded inconsistent results (19-22). While counterintuitive,  
116 these findings are in agreement with several studies showing the adverse influence  
117 of uncontrolled overproduction of natural antioxidant systems (including GPXs) on  
118 redox metabolism and disease outcome (22). Further, over-expression of GPXs  
119 might not be sufficient as cellular GPX activity is enhanced by oxidative stress

120 responsive post-translational modifications (PTMs) such as phosphorylation,  
121 carbonylation and O-GlcNAcylation (23-25). Besides this, the activity of GPXs is also  
122 dependent on the availability of selenium (Se), an essential micronutrient that has  
123 been reported to be low in HIV patients (16). In this context, artificial nanozymes  
124 mimicking GPX-like activity (e.g.,  $V_2O_5$  NPs) with high sensitivity and specificity  
125 under physiological conditions found in the human body (i.e. mild temperature, pH 4-  
126 8, and aqueous buffer) can provide a suitable alternate to natural GPXs. We  
127 envisage that antioxidant nanozymes can be exploited to generate new knowledge  
128 on redox signaling mechanisms underlying HIV-1 latency and reactivation, which  
129 could aid the development of fresh therapeutic approaches for targeting HIV.

130

131 In this work, we exploited multiple interdisciplinary approaches to describe the  
132 utility of  $V_2O_5$  thin-nanosheet (Vs) displaying functional GPX activity in dissecting  
133 redox signaling underlying HIV-1 latency. By exploiting genetic reporters, cellular  
134 models of HIV-1 latency, and HIV transgenic mice (Tg26), we discovered that Vs-  
135 mediated remediation of ROS efficiently subverted reactivation of HIV-1 and survival  
136 of another human pathogen (*Mycobacterium tuberculosis* [*Mtb*]) that frequently  
137 infects HIV patients. Our study provides an elegant example of how antioxidant  
138 nanozymes can be explored to understand the redox basis of human infections.

139

## 140 **Results**

### 141 **Synthesis and biophysical characterization of catalytically efficient $V_2O_5$ thin-** 142 **nanosheets (Vs)**

143 We have recently shown that the  $V_2O_5$  nanomaterials exhibit excellent  
144 isoform-specific GPX activity, which is dependent on the surface exposed crystal

145 facets (26). To make  $V_2O_5$  nanomaterials biologically useful, we focused on two  
146 distinct morphologies of  $V_2O_5$  nanomaterials i.e. wires (VNw) and sheets (VSh) (Fig.  
147 S1, A and B). Both the morphologies displayed similar surface-exposed crystal facet  
148 {001}. However, VSh exhibited a higher GPX reaction rate as compared to VNw as  
149 determined by measuring the decrease in NADPH absorbance at 340 nm using  
150 glutathione reductase (GR)-coupled assay (see *Materials and Methods*) (Fig. S1C).  
151 Smaller nanoparticles often display higher catalytic activity (27-31). Therefore, we  
152 made subtle modifications in VSh preparation to generate ultrathin-nanosheets (Vs)  
153 (Fig. 1A). We confirmed the morphology of Vs by scanning electron microscopy  
154 (SEM) (Fig. 1B). Examination of the rate of GPX activity revealed that Vs possesses  
155 a 1.6- to 2-fold higher capacity to reduce  $H_2O_2$  in the GR-coupled assay (Fig. 1C) as  
156 compared to VNw and VSh (Fig. 1D). A comparison of activities with three different  
157 peroxides -  $H_2O_2$ , tertiary-butyl hydroperoxide (*t*-BuOOH) and cumene hydroperoxide  
158 (Cum-OOH), indicates that Vs is very selective towards  $H_2O_2$  (Fig. 1E). Based on  
159 this, we carried out the extensive biophysical and biochemical characterization of Vs  
160 *in vitro*.

161

162 First, we recorded the crystalline nature of the lyophilized, thin nanosheets,  
163 Vs, by the powder X-ray diffraction pattern (PXRD) (Fig. S2A). The PXRD pattern  
164 was indexed to the standard  $V_2O_5$  orthorhombic phase ( $a = 11.5160 \text{ \AA}$ ,  $b = 3.5656 \text{ \AA}$ ,  
165  $c = 4.3727 \text{ \AA}$ , JCPDS = 41-1426, Space group Pmmn). Second, we examined the  
166 crystal facets exposed in the Vs material using high-resolution transmission electron  
167 microscopy (HRTEM) and selected area electron diffraction (SAED) pattern analysis.  
168 The observed lattice fringes for Vs are (200) and (110) with d-spacing of 0.58 nm  
169 and 0.34 nm, respectively, with the interfacial angle of  $72.8^\circ$ . The interfacial angle

170 between two planes (110) and (-110) with equidistant d-spacing is  $34.4^\circ$  (Fig. S2B  
171 and 1F). These three planes in the HRTEM fall in the common zone axis [001]. In  
172 both the figures, SAED patterns (inset) were well indexed along [001] zone axis,  
173 which confirms that the surface exposed facets are indeed [001]. These results  
174 agree with the most intense peak due to (001) plane observed in the PXRD pattern  
175 of Vs.

176

177 Third, we performed FT-Raman spectroscopy to determine the nature of  
178 bonding formed between the metal and oxygen atoms in the orthorhombic  $V_2O_5$   
179 crystals. The FT-Raman spectra showed a peak around  $995\text{ cm}^{-1}$ , which  
180 corresponds to the terminal (V=O) resulting from the unshared oxygen atom of the  
181  $V_2O_5$  crystal (Fig. 1G). The peaks detected at lower vibration frequencies are  
182 consistent with the lattice vibrations of layered material (32-34). We examined the  
183 purity of Vs by confirming the detection signal for vanadium (V) and oxygen ( $O_2$ )  
184 using point energy dispersive X-ray spectroscopy (EDS) (Fig. 1H). A small signal  
185 detected at 2 KeV is due to the gold (Au) sputtering of the sample during spectrum  
186 recording. Fourth, we confirmed the elemental composition and purity of the Vs  
187 material by selected area bright field (SABF) images and X-ray mapping images  
188 (Fig. 1I). Both these techniques confirmed that Vs material has a homogenous  
189 distribution of vanadium (V) and oxygen ( $O_2$ ) (Fig. 1, J and K). Finally, we  
190 determined the oxidation state of the Vs material using X-ray photoelectron  
191 spectroscopy (XPS). The analysis revealed binding energies (BE) and full width at  
192 half maxima (FWHM) for the  $V2p_{3/2}$  and  $V2p_{1/2}$  peaks as well as the difference in  
193 the BE between  $O1s$  and  $V2p_{3/2}$  orbitals (12.8 eV). All of this confirms that  
194 vanadium exists in the +5-oxidation state in Vs (Fig. S3A – S3C).



195

## 196 **Vs displays efficient H<sub>2</sub>O<sub>2</sub> linked GPX activity**

197 Having established the biophysical characteristics of Vs, we examined the  
198 GPX-mimetic activity of Vs using GR-coupled assay as described earlier (Fig. 1C).  
199 Various control experiments, such as reactions lacking GSH/GR/H<sub>2</sub>O<sub>2</sub>, were  
200 performed to rule out the possibility of nonspecific reactions. We observed that in the  
201 absence of any one of the required constituents, Vs does not show GPX-like activity  
202 i.e., no reduction of H<sub>2</sub>O<sub>2</sub> takes place (Fig. 2A, and S4A). Varying the concentration  
203 of Vs from 0 to 20 ng/μL led to a proportional dependence of the initial rate for the  
204 reduction of H<sub>2</sub>O<sub>2</sub> with first-order reaction kinetics (Fig. 2B). Since both H<sub>2</sub>O<sub>2</sub> and  
205 GSH are important for the GPX activity, we performed the activity assay by varying  
206 concentrations of H<sub>2</sub>O<sub>2</sub> (0-400 μM) and GSH (0-7 mM) under steady state condition.  
207 Typical enzymatic Michaelis-Menten kinetics was observed for both H<sub>2</sub>O<sub>2</sub> and GSH  
208 (Fig. 2, C and D). The corresponding Lineweaver-Burk plots are depicted in fig. 2E  
209 and 2F. For comparison, we simultaneously performed kinetics of Vs, VSh, and  
210 VNw. Interestingly, the V<sub>max</sub> values for Vs and VSh correlate with their surface area  
211 with an exception of VNw (Fig. 2, G and H). This is consistent with the differences in  
212 the {001} exposed facets among three morphologies. For H<sub>2</sub>O<sub>2</sub>, the K<sub>M</sub> values  
213 obtained for VNw, VSh, and Vs were 44.4 ± 1.7, 57.3 ± 3.8, and 112.2 ± 3.8 μM,  
214 respectively (Fig. 2H). This indicates that the surface of the nanowires and  
215 nanosheets (VNw & VSh) are saturated at lower concentrations of H<sub>2</sub>O<sub>2</sub> (26),  
216 whereas relatively higher concentrations of H<sub>2</sub>O<sub>2</sub> are required for the saturation of  
217 the surface of thin nanosheets (Vs).

218

219 The stability of the nanomaterials for the reduction of H<sub>2</sub>O<sub>2</sub> was examined by  
220 performing multiple assay cycles, which demonstrate only a marginal loss of catalytic  
221 activity (Fig. S5A). TEM measurements of nanomaterial surface before and after  
222 multiple rounds of catalysis indicate no alterations (Fig. S5B and S5C), confirming  
223 that Vs performs H<sub>2</sub>O<sub>2</sub> reduction with unprecedented stability, specificity, and  
224 sensitivity *in vitro*.

225

### 226 **Vs mimics GPX activity inside the HIV-1 infected cells**

227 To test the Vs-related GPX activity inside mammalian cells and to understand  
228 its influence on HIV-1, we selected the U1 cell line model of HIV-1 latency and  
229 reactivation. The U1 cell line is derived from the parent promonocytic cell line U937,  
230 wherein two copies of the HIV-1 genome is latently integrated (35). The viral  
231 replication can be induced by treatment of U1 cells with various pro-inflammatory  
232 agents such as phorbol myristate acetate (PMA), tumor necrosis factor-alpha (TNF-  
233  $\alpha$ ), and granulocyte-macrophage colony-stimulating factor GM-CSF (35,36). We first  
234 examined the uptake of Vs nanomaterial by U1 through inductively coupled plasma  
235 mass spectrometry (ICP-MS). As shown in fig. 3A, 15 min of Vs exposure led to its  
236 buildup inside U1, which was gradually decreased over time such that only a fraction  
237 of Vs was retained intracellularly (Fig. 3A). We also found that survival of U1 was not  
238 adversely affected by a range of Vs concentration (Fig. S6A).

239

240 To examine the role of Vs in the intracellular reduction of H<sub>2</sub>O<sub>2</sub> through GPX  
241 activity, we exploited Orp1-roGFP2 and Grx1-roGFP2 biosensors that allow non-  
242 invasive imaging of the intracellular H<sub>2</sub>O<sub>2</sub> and  $E_{GSH}$ , respectively (37-39). The  
243 roGFP2 moiety has two surface exposed cysteines, which undergo disulfide bond

244 formation upon oxidation resulting in an increase in fluorescence excitation intensity  
245 at 405 nm along with a relative decrease at 488 nm excitation at a fixed emission of  
246 510 nm (37). An inverse relation in 405/488-biosensor ratio was detected upon the  
247 reduction of disulfides. The specific equilibration of the roGFP2 dithiol-disulfide redox  
248 pair (roGFP2<sub>red</sub>/roGFP2<sub>oxi</sub>) either with H<sub>2</sub>O<sub>2</sub> or with glutathione redox pair  
249 (GSH/GSSG) is efficiently catalyzed by the covalently fused peroxidase Orp1 or  
250 glutaredoxin Grx1, respectively (38, 39). The fusion of Orp1 with roGFP2 creates a  
251 redox relay in which Orp1 mediates near-stoichiometric oxidation of roGFP2 by H<sub>2</sub>O<sub>2</sub>  
252 (38) (Fig. 3B). Likewise, Grx1 mediates oxidation of roGFP2 in response to a  
253 nanomolar increase in intracellular GSSG upon H<sub>2</sub>O<sub>2</sub> stress (37). The redox relay  
254 created by Orp1-roGFP2 or Grx1-roGFP2 demonstrates dynamic behavior as the  
255 biosensor ratio returns to basal during recovery from oxidative stress due to  
256 normalization of H<sub>2</sub>O<sub>2</sub> and GSSG levels (37, 39).

257

258 We created stable transfected U1 cells that express either Orp1-roGFP2 (U1-  
259 Orp1-roGFP2) or Grx1-roGFP2 (U1-Grx1-roGFP2) in the cytosol (Fig. S7, A and B).  
260 Exposure of U1-Orp1-roGFP2 to H<sub>2</sub>O<sub>2</sub> for 2 min showed a concentration-dependent  
261 increase in the biosensor ratio, consistent with the Orp1-mediated oxidation of  
262 roGFP2 by H<sub>2</sub>O<sub>2</sub> (Fig. 3C). In contrast, pretreatment of U1-Orp1-roGFP2 with 25 and  
263 50 ng/μL of Vs for 15 min diminished biosensor oxidation by H<sub>2</sub>O<sub>2</sub>, consistent with  
264 the Vs-catalyzed reduction of H<sub>2</sub>O<sub>2</sub> (Fig. 3C). Because H<sub>2</sub>O<sub>2</sub> exposure also leads to  
265 oxidation of reduced GSH to GSSG (9), we monitored this transformation using  
266 Grx1-roGFP2 biosensor (Fig. 3D). The U1-Grx1-roGFP2 cells were challenged with  
267 various concentrations of H<sub>2</sub>O<sub>2</sub> for 2 min, and the sensor response was quantified.  
268 We found that the biosensor responds to increasing concentrations of H<sub>2</sub>O<sub>2</sub> and

269 treatment with 100  $\mu\text{M}$  of  $\text{H}_2\text{O}_2$  for 2 min results in 90% oxidation of Grx1-roGFP2  
270 (Fig. 3E). The corresponding  $E_{\text{GSH}}$  was -240 mV, which is higher than the basal  $E_{\text{GSH}}$   
271 for U1 cells, -320 mV. Pretreatment of U1-Grx1-roGFP2 with Vs for 15 min  
272 effectively reduced  $\text{H}_2\text{O}_2$  mediated oxidation of biosensor in a concentration  
273 dependent manner (Fig. 3E). Next, we measured the time kinetics of Grx1-roGFP2  
274 oxidation to a low concentration of  $\text{H}_2\text{O}_2$  (50  $\mu\text{M}$ ). An increase in the biosensor ratio  
275 was observed within 2 min of  $\text{H}_2\text{O}_2$  exposure followed by a gradual decrease to the  
276 baseline levels in 30 min, indicating efficient mobilization of cellular antioxidant  
277 machinery (37) (Fig. 3F). In contrast, the addition of 50 ng/ $\mu\text{L}$  of Vs at post  $\text{H}_2\text{O}_2$   
278 treatment decreased the biosensor oxidation to baseline levels within 10 min (Fig.  
279 3F). Importantly, a single dose of Vs completely prevented subsequent oxidation of  
280 biosensor by  $\text{H}_2\text{O}_2$  (Fig. 3F). This data is fully consistent with earlier results  
281 demonstrating multiple cycles of  $\text{H}_2\text{O}_2$  reduction by a single dose of Vs *in vitro*.

282

283 Since GPX function is dependent on GSH as an electron donor (40), we  
284 tested the requirement of GSH in Vs-mediated  $\text{H}_2\text{O}_2$  reduction. We treated U1-Grx1-  
285 roGFP2 cells with 0.5 mM buthionine sulfoximine (BSO), which lowers cellular GSH  
286 content by inhibiting  $\gamma$ -glutamyl cysteine synthetase (GCS) activity (41). Following  
287 this, cells were treated with Vs for 15 min and exposed to 50 and 100  $\mu\text{M}$  of  $\text{H}_2\text{O}_2$  for  
288 2 min. As shown earlier, both the concentrations of  $\text{H}_2\text{O}_2$  achieved nearly complete  
289 oxidation of Grx1-roGFP2, which was effectively blocked by Vs pretreatment (Fig.  
290 3G). In contrast, pretreatment with BSO attenuated Vs ability to prevent biosensor  
291 oxidation by  $\text{H}_2\text{O}_2$  (Fig. 3G). Supplementation of exogenous GSH (15 mM) restored  
292 Vs activity as shown by a significant decrease in the biosensor oxidation upon  
293 challenge with a saturating concentration of  $\text{H}_2\text{O}_2$  (Fig. 3H).

294

## 295 **Vs subverts HIV-1 reactivation**

296         Studies have shown that H<sub>2</sub>O<sub>2</sub> treatment reactivates HIV-1 from latency (15,  
297 42). Increased oxidative stress was shown to activate the HIV-1 LTR through redox-  
298 sensitive transcription factors, such as NF-κB (11). On this basis, we reasoned that  
299 Vs displaying efficient antioxidant activity could affect redox-dependent reactivation  
300 of HIV-1. We first induced HIV-1 expression using low concentrations of PMA (5  
301 ng/mL) and prostatin (1.25 μM), two well-established activators of HIV-1 (43, 44).  
302 The expression of the HIV-1 *gag* transcript was monitored as a marker of HIV-1  
303 activation by qRT-PCR at various time points post-treatment with PMA/prostatin.  
304 Both activators induced HIV-1 transcription with a significant increase observed at 24  
305 h post-treatment (Fig. 4A). Pre-exposure of U1 with Vs or N-acetyl cysteine (NAC- a  
306 well-established antioxidant) effectively blocked PMA/prostatin-mediated viral  
307 reactivation (Fig. 4, A and B). Using U1-Orp1-roGFP2, we confirmed an increase in  
308 the intracellular levels of H<sub>2</sub>O<sub>2</sub> at 6 and 12 h post-PMA treatment, which was  
309 significantly reduced upon Vs pretreatment (Fig. 4C). This indicates that oxidative  
310 stress precedes PMA-stimulated virus reactivation and GPX activity associated with  
311 Vs counteracted redox-dependent HIV-1 reactivation. The capacity of Vs in  
312 lessening HIV-1 activation was also confirmed in a lymphocytic model of HIV-1  
313 latency (J1.1) (Fig. 4D), corroborating that the effect of Vs is not restricted to a cell-  
314 type.

315

316         HIV infected individuals suffer from selenium (Se) deficiency that adversely  
317 affects the activity of Se-dependent GPX enzyme leading to oxidative stress, HIV  
318 reactivation, and exacerbation of disease pathology (16, 45). Therefore, Se limitation

319 is a physiologically relevant stimulus that induces oxidative stress and HIV-1  
320 reactivation (46). We envisage that Se-independent GPX activity of Vs could  
321 replenish the impaired activity of cellular GPX under Se deficient conditions to  
322 subvert HIV-1 reactivation. To examine this, we starved U1-Grx1-roGFP2 of fetal  
323 bovine serum (FBS; the source of Se) and monitored the change in its antioxidant  
324 response over time. We observed an increase in biosensor ratio within 30 min of  
325 FBS removal, indicating oxidative stress (Fig. S8A). Supplementation of Vs or Se in  
326 the culture medium of Se-deficient U1-Grx1-roGFP2 decreased biosensor ratio,  
327 signifying alleviation of oxidative stress by Vs (Fig. 4E). As expected, Se-deficiency  
328 triggered HIV-1 reactivation in U1, and addition of Vs or Se had an opposite effect  
329 (Fig. 4F).

330

### 331 **Vs adversely affects intracellular replication of HIV-1 and *Mtb***

332 Along with reactivation, oxidative stress has been shown to promote HIV-1  
333 replication (9). Therefore, we next examined the influence of Vs activity on HIV-1  
334 replication. First, we used a stable CD4<sup>+</sup> T cell clone expressing EGFP (CEM-GFP)  
335 under HIV-1 LTR. Infection with HIV-1 significantly induces the expression of CEM-  
336 GFP (47). The infection of CEM-GFP cells with T cell-tropic HIV-1 provirus (pNL4.3)  
337 progressively increased GFP fluorescence over 5 days (Fig. 5A). Addition of 50  
338 ng/μL of Vs for 15 min every 24 h completely blocked GFP expression in the infected  
339 CEM-GFP cells (Fig. 5A). We also infected Jurkat CD4<sup>+</sup> T cells with pNL4.3 virus  
340 and measured *gag* transcript, and p24 HIV capsid protein in the whole cell lysate and  
341 in the supernatant. Each technique showed a time-dependent increase in HIV-1  
342 replication, while treatment with Vs resulted in a significant inhibition (Fig. 5, B to D).  
343 Finally, we infected U937 promonocytic cells with macrophage (M)-tropic HIV pro-

344 virus, pNLAD8, and HIV-1 replication was measured by measuring *gag* transcript at  
345 24 h post-treatment. As shown in fig. 5E, HIV-1 infected U937 showed a 15-fold  
346 increase in *gag* transcript, which was reduced to 3-fold in case of Vs pre-treatment.  
347 We also examined if antioxidant potential of Vs confers anti-viral response in primary  
348 human CD4 T lymphocytes. We pretreated primary CD4 T cells isolated from human  
349 peripheral blood mononuclear cells (PBMCs) with Vs (25 ng/μl), infected with HIV-1  
350 NL4.3, and measured HIV-1 replication at 3- and 5-days post-infection. The p24  
351 ELISA confirmed 100 to 200-fold increase in virus replication at 3 to 5 days post-  
352 infection, respectively (Fig. 5F). In contrast, pretreatment of Vs restricted virus load  
353 to 20- to 80- fold at these time-points (Fig. 5F).

354

355 We have previously shown that oxidative stress promotes synergy between  
356 *Mtb* and HIV (15, 48). Antioxidant GSH has been shown to reduce *Mtb* load in HIV-  
357 infected individuals, while NAC lowers the survival of *Mtb* in mice and guinea pigs  
358 (49, 50). On this basis, we assessed if the antioxidant potential of Vs affects the  
359 survival of *Mtb* in macrophages infected with HIV-1. PMA-differentiated U1 were  
360 infected with a laboratory strain of *Mtb* (H37Rv) and a multidrug-resistant patient  
361 isolate (JAL 2287) (51). Bacterial survival was monitored at 4 h and 24 h post-  
362 infection. *Mtb* H37Rv and Jal 2287 displayed 1.78- and 2.74-fold increase in survival  
363 at 24 h post-infection, respectively (Fig. 5, G and H). Notably, pretreatment with Vs  
364 completely abrogated the ability of *Mtb* strains to multiply inside U1 (Fig. 5, G and H).  
365 In sum, Vs catalytic activity efficiently counteracts replication of HIV-1 and *Mtb*.

366

367 **Vs dampens the expression of host genes involved in HIV-1 reactivation**

368 Having shown the utility of Vs in counteracting oxidative stress and HIV-1  
369 reactivation, we next examined the underlying mechanisms. We performed  
370 expression analysis using the NanoString nCounter system, which permits absolute  
371 quantification of multiple RNA transcripts without any requirements for reverse  
372 transcription (52). We focused on 185 host genes that are known to respond to HIV  
373 infection and oxidative stress (Table S1A-S1C). We performed expression analysis  
374 on RNA isolated from U1, PMA treated U1, Vs treated U1, and Vs plus PMA treated  
375 U1. The fold change (> 1.5-fold, P-value < 0.05) was calculated by normalizing the  
376 raw mRNA counts to the geometric mean of the internal control  $\beta_2$  microglobulin  
377 (B2M).

378

379 A total of 123 genes showed differential expression under the conditions  
380 tested (Fig. 6A). Overlap analysis confirmed 55 of 123 genes to be common in each  
381 category (Fig. 6B). Treatment with PMA induced the expression of genes associated  
382 with ROS and RNS (reactive nitrogen species) generation (e.g., NADPH oxidase  
383 subunits [NCF1, NCF2] and nitric oxide synthase [NOS2]). Genes involved in  
384 antioxidant response, including catalase (CAT) and superoxide dismutase 2 (SOD2),  
385 were downregulated upon PMA treatment (Fig. 6C). Overall, these changes are  
386 consistent with increased oxidative stress in response to PMA triggered HIV-1  
387 reactivation (15). Up-regulation of genes involved in reducing free iron pool (ferritin  
388 heavy chain1; FTH1), maintaining GSH balance (cysteine/glutamate transporter;  
389 SLC7A11), (Fig. 6C), indicate a compensatory mechanism to protect from oxidative  
390 conditions induced by PMA (53,54). The transcription factor Nrf2 is the major  
391 activator of antioxidant systems (55). Surprisingly, a majority of Nrf2 dependent  
392 antioxidant systems such as GSH biosynthesis/recycling (e.g., GSS, GPX1, GPX4,  
393 GSTP1), thioredoxins (e.g., TXNRD2), and peroxiredoxins (PRDX6) were down



394 regulated upon treatment with Vs alone or Vs plus PMA (Fig. 6C), indicating an  
395 adverse influence of Vs on U1 cells. One likely possibility is that the natural  
396 antioxidant defense mechanisms are attenuated by a feedback-like mechanism  
397 because of the potent antioxidant properties of Vs. Also, the expression of  
398 superoxide producing system (NCF1 and NCF2) was repressed in Vs alone and Vs  
399 plus PMA treated U1 (Fig. 6C), which can further reduce intracellular ROS levels.

400

401 Genes known to be associated with HIV-1 activation such as transcription  
402 factors (*e.g.*, FOS and CEBPB) (56, 57), inflammatory cytokines/receptors (TGF $\beta$ 1,  
403 TNFRSF1B, and IL16) (58-60), and chemokines (CCL3 and CCL4) (61) were  
404 induced upon PMA treatment and repressed by Vs plus PMA (Fig. 6C). Several  
405 genes encoding proteins associated with HIV-1 replication, packaging, budding, and  
406 fitness (*e.g.*, APOBEC3G, CD44, XPO1, VPS4A, DHCR24) were down-regulated  
407 upon Vs plus PMA treatment as compared to PMA alone (Fig. 6D). It is known that  
408 cells latently infected with HIV-1 are refractory to apoptosis, whereas increased  
409 apoptosis promotes HIV-1 reactivation (62). Consistent with this, a majority of genes  
410 encoding pro-apoptotic proteins (*e.g.*, BAD, BAX, CASP3, and CASP8) were  
411 substantially repressed upon Vs plus PMA treatment as compared to PMA alone  
412 (Fig. 6C). In addition, a cellular inhibitor of transcription factor NF- $\kappa$ B (*i.e.* NFKBIA)  
413 was highly induced upon Vs or Vs plus PMA treatment (Fig. 6D). Since NF- $\kappa$ B is  
414 known to activate HIV-1 in response to oxidative stress (10), the induction of its  
415 inhibitor (NFKBIA) by Vs is indicative of reduced reactivation of HIV-1 through NF-  
416  $\kappa$ B. Based on this, we hypothesize that a well-established pharmacological inhibitor  
417 of NF- $\kappa$ B (*E*)-3-[(4-methylphenyl)sulfonyl]-2-propenenitrile (BAY11-7082) (63) would  
418 synergies with Vs to efficiently subvert HIV-1 reactivation. To examine this, we

419 exposed U1 cells pretreated with Vs to BAY11-7082 and HIV-1 reactivation in  
420 response to PMA was monitored by measuring the levels of *gag* transcript and p24  
421 capsid protein. Consistent with our hypothesis, exposure of U1 to both Vs and  
422 BAY11-7082 suppresses reactivation of HIV-1 which supersedes that produced by  
423 either Vs or BAY11-7082 alone (Fig 6E and 6F). Overall, Vs not only affected the  
424 expression of redox pathways but as a consequence also modulates the expression  
425 of pathways coordinating the inflammatory response, viral fitness, transcription, and  
426 apoptosis to subvert HIV-1 reactivation.

427

#### 428 **Vs mitigates oxidative stress and HIV-1 associated pathologies *in vivo***

429 Given our findings that Vs diminishes oxidative stress to reduce HIV-1  
430 reactivation in cell lines, we sought to determine the impact of Vs on oxidative stress  
431 and HIV-1 associated pathologies *in vivo*. We used an HIV-1 transgenic mouse  
432 (Tg26), which harbors a replication-incompetent,  $\Delta gag$  variant of pNL4.3/HIV (64).  
433 Expression of HIV-1 proteins in Tg26 promotes oxidative stress and recapitulates  
434 clinical lesions observed in HIV infected patients (*e.g.*, lung damage and  
435 nephropathy) (64-66).

436

437 We treated Tg26 C57BL/6 mice with Vs (1 mg/kg body weight) intra-  
438 peritoneally (*i.p.*). Untreated or Vs-treated animals were euthanized 3 h post-  
439 treatment and oxidative stress was measured in the lungs (Fig. 7A). The lung  
440 homogenates were stained with redox-active fluorescent dye 2',7' -  
441 dichlorofluorescein diacetate (DCFDA), and subjected to flow cytometry. As shown in  
442 figure 7B, total cellular populations within lung homogenates derived from Vs treated  
443 Tg26 displayed diminished fluorescence as compared untreated Tg26. Based on the

444 forward and side scatter gating, we gated different populations representing mostly  
445 granulocytes (P2), monocytes (P3) and lymphocytes (P4). The level of fluorescence  
446 within multiple cell types was consistently lower in the case of Vs treated Tg26 than  
447 untreated Tg26 animals (Fig. 7B). Using antibodies against CD64 and MERTK  
448 markers, we specifically gated lung macrophages and confirmed lower ROS in cells  
449 derived from Vs treated Tg26 animals than untreated Tg26 (Fig. 7C). The lung cells  
450 derived from *Wt* C57BL/6 showed ROS levels comparable to Vs treated Tg26  
451 animals (Fig. 7, B and C). Consistent with a strong antioxidant activity of Vs,  
452 expression of other cellular antioxidant genes were either down-regulated (*e.g.*,  
453 GPX1) or unchanged (GPX4, SOD1, and SOD2) in the lungs of Vs treated Tg26 as  
454 compared to untreated animals (Fig. 7D and Fig. S9A). One of the clinical signs of  
455 HIV infection is inflammation (67). The Tg26 mice display edema in various organs,  
456 which is a marker for inflammation and fluid accumulation (65). Treatment with Vs  
457 significantly reduced lung edema in Tg26 animals (Fig. 7E). Lastly, we confirmed  
458 that Vs treatment reduced the expression of HIV-1 transcript (*tat-rev* region) by  
459 ~65% in Tg26 mice (Fig. 7F). Altogether, our findings position Vs as a potential  
460 alternative to natural GPX enzyme(s) for regulating redox signaling, inflammation,  
461 and virus expression *in vivo*.

462

## 463 **Discussion**

464 Studies exploring the application of antioxidant nanozymes in targeting human  
465 pathogens are limited. In-depth cellular studies using laboratory models that mimic  
466 the physiological environment during infection could help predict the clinical potential  
467 of nanozymes and will encourage new designs that are efficacious in humans. Using  
468 several biophysical, biochemical, cellular, genetic biosensors, animal model, and

469 expression technologies, we demonstrated the biomedical application of  $V_2O_5$  based  
470 nanozymes in counteracting redox stress and reactivation of HIV-1. We showcase  
471 the remarkable efficacy of Vs against various physiological conditions, including Se  
472 starvation and infection with secondary pathogens such as *Mtb*.

473

474  $V_2O_5$  nanoparticles possess intrinsic peroxidase-mimicking activity (8). By  
475 modifying  $V_2O_5$  nanomaterial into various morphologies, we reported efficient GSH-  
476 dependent GPX activity of  $V_2O_5$  nanozymes (26). In the present study, we further  
477 fine-tuned the crystal facets of  $V_2O_5$  nanomaterial to generate a thinner nanosheet  
478 (Vs), which displayed high catalytic activity in the presence of GSH. Other properties,  
479 such as the formation of stable V-peroxo species that ensure GSH specificity,  
480 multiple recycling without loss of activity, and stability in a range of organic solvents  
481 (698) motivated us to exploit  $V_2O_5$  nanomaterial in understanding GSH/GPX based  
482 redox signaling during HIV-1 infection. Until now, studies examining the antioxidant  
483 function of nanozymes relied on *in vitro* enzymatic assays or chemical analyses of  
484 redox metabolites (e.g., GSH/GSSG) in whole cells or tissues. These invasive  
485 methods introduce oxidation artifacts and preclude observation of real-time changes  
486 in redox physiology upon nanozyme treatment. We circumvented these issues by  
487 applying non-invasive genetically encoded biosensors of  $H_2O_2$  (Orp1-roGFP2) and  
488  $E_{GSH}$  (Grx1-roGFP2) to dynamically assess the activity of Vs in reducing intracellular  
489  $H_2O_2$  and maintaining GSH homeostasis.

490

491 Numerous studies have indicated a link between GPX activity and HIV-1 *in*  
492 *vitro* and *in vivo* (16, 21). Remediation of  $H_2O_2$  by GPXs potentially reversed NF- $\kappa$ B-  
493 mediated HIV-1 transcription (21). We have demonstrated that latently infected cells

494 efficiently metabolized H<sub>2</sub>O<sub>2</sub> likely via endogenous GPXs (15). Expression of GPXs  
495 was elevated in monocytes and lymphocytes harboring latent HIV-1, whereas  
496 expression was diminished in cells and in PBMCs of patients during active HIV-1  
497 replication (15). Since the activity of cellular GPXs is selenium (Se)-dependent,  
498 studies have found a high correlation between Se-deficiency, GPX activation, and  
499 HIV-related mortality (45). Importantly, HIV-1 infected T-cells showed the general  
500 downregulation of cellular Se-proteins (69). We found that Se depletion induced the  
501 oxidative shift in  $E_{GSH}$  and promotes HIV reactivation. Importantly, Vs  
502 supplementation under Se depleted conditions was sufficient to diminish oxidative  
503 stress and HIV-1 reactivation. Mechanistically, our Nanostring data confirm that  
504 GPX-like activity of Vs efficiently suppresses the expression of redox-dependent  
505 transcription factors, pro-inflammatory cytokines/chemokines, and pro-apoptotic  
506 molecules required for HIV-1 reactivation. In line with our findings, transcriptomics of  
507 whole blood RNA from elite controllers (ECs) to that of individuals with high viral load  
508 showed that cytokine signaling, apoptosis, anti-viral response, and immune  
509 activation are mainly affected (70-72). Our data align well with the meta-analyses  
510 where pathways promoting oxidative stress and viral transcription such as NCF2,  
511 ACTB, FOS, CEBPB are downregulated in ECs and antioxidants (GPX1 and GPX4)  
512 were induced as compared to viremic progressors (71,72).

513

514 Individuals co-infected with HIV and *Mtb* pose major problems in disease  
515 management. We showed that basic mechanisms such as intracellular redox  
516 potential and bioenergetics contribute to synergy between HIV and *Mtb* (15,48,73).  
517 Diminished levels of host GSH, GPX4, and increased ROS contribute to the survival  
518 of *Mtb in vivo* (74). Similar to these observations, supplementation of GPX activity by

519 Vs hampered multiplication of *Mtb* and drug-resistant clinical isolate in U1 cells pre-  
520 exposed to Vs. Finally, the biological importance of our findings comes from the data  
521 showing reduced oxidative stress, inflammation, and expression of HIV-1 transcripts  
522 in Tg26 mice treated with Vs. While our findings provide a clear relationship between  
523 catalytic activity of Vs with HIV-1 reactivation and redox signaling, future experiments  
524 are needed to exploit Vs for the development of sustainable, affordable, and safe  
525 therapeutics against HIV-1 infection. The importance of nanomaterials in infectious  
526 diseases is emerging as silver and gold-based nanomaterials have been shown as  
527 promising candidates for therapeutic applications against bacterial and viral  
528 pathogens (75-78).

529

530 In conclusion, we have presented compelling experimental evidence that  
531 strongly suggests the application of Vs in modulating redox signaling associated with  
532 HIV-1 latency and reactivation. Antiretroviral therapy (ART), while effective in  
533 reducing viral load, remains unsuccessful in eradicating HIV from latent reservoirs  
534 and induces systemic oxidative stress (79). Recently, a concept called “block and  
535 lock” showed that blocking host (*e.g.*, heat shock protein 90 (HSP90), NF- $\kappa$ B, protein  
536 kinase C (PKC) or viral factors (*e.g.*, Tat) involved in reactivation significantly  
537 delayed viral rebound upon interruption of ART (80). Our findings on Vs showed  
538 promise in preventing reactivation from latency, raising the possibility of locking HIV  
539 in an extended latency by blocking redox-mediated HIV-1 transcription, and also  
540 improving the health of individuals on ART by minimizing oxidative stress.

541

## 542 **Materials and methods**

### 543 **Preparation of thin vanadia (V<sub>2</sub>O<sub>5</sub>) nanosheets (Vs)**

544 Thin  $V_2O_5$  nanosheets (Vs) were synthesized from the crude  $V_2O_5$   
545 nanosheets (VSh). Briefly, 2 mM of  $V_2O_5$  powder was dispersed in 15 ml ultrapure  
546 water for 20 min. Then 15 mL  $H_2O_2$  (30% w/v) was added dropwise. During the  
547 addition of  $H_2O_2$  the colour of the solution changed from yellow to orange and then to  
548 red. The red solution turns dark brown after stirring for 2.5 h at room temperature  
549 (RT). This reaction was strictly performed in a fume hood due to its exothermic  
550 nature. After continuous stirring for 2.5 h, 10 mL of ultrapure water was added into  
551 the mixture and heated to 60°C overnight to form a brownish gel ( $V_2O_5 \cdot nH_2O$ ). This  
552 gel was dried at 100°C for 12 h and subsequently calcined at 400°C for 2 h to get  
553 crude VSh. Following this, VSh was probe sonicated in ultrapure water for 2 h to get  
554 a dense dispersion of nanosheets. The dispersion was then centrifuged at 3000 rpm  
555 for 5 min and the bright yellow colour supernatant was lyophilised to obtain the  
556 powdered form of thin  $V_2O_5$  nanosheets (Vs).

557

### 558 **Characterization of Vs**

559 Powder X-ray diffraction (PXRD) was recorded by Phillips PANalytical  
560 diffractometer using a  $CuK\alpha$  ( $\lambda = 1.5406 \text{ \AA}$ ) radiation. The emission current and  
561 accelerating voltage used in the diffractometer were 30 mA and 40 kV respectively.  
562 For morphological and elemental characterization, EDS and scanning electron  
563 microscopy (SEM) were performed on FEI Sirion UHR SEM and ESEM-Quanta  
564 respectively. Transmission electron microscopy (TEM), High resolution transmission  
565 electron microscopy (HRTEM), and X-ray mapping images were recorded on JEOL  
566 transmission electron microscope operated at 200 kV after casting a drop of  
567 nanoparticle dispersion in isopropyl alcohol, over a Cu grid. FT-Raman spectra were  
568 recorded using a Renishaw in-Via Raman Microscope (Renishaw Inc, UK), with

569 excitation wavelength 514 nm. To perform all the enzyme mimetic activity assay,  
570 SHIMADAZU UV-2600 spectrophotometer was used. X-ray photoelectron  
571 spectroscopy (XPS) was performed using AXIS Ultra, KRATOS ANALYTICAL,  
572 SHIMADAZU. The surface area measurement was performed by Brunauer-Emmett-  
573 Teller (BET) method on the micromeritics surface area analyzer model ASAP 2020.

574

### 575 **GPX – mimicking activity of V<sub>2</sub>O<sub>5</sub> nanoparticles (NPs)**

576 The GPX-like activity of V<sub>2</sub>O<sub>5</sub> NPs was assessed spectrophotometrically by  
577 using the standard GR-coupled GPX assay (8). The components and the  
578 concentration used in this assay mixture were GSH (2.0 mM), NADPH (0.2 mM), GR  
579 1.7 U, catalyst 20 ng/μL, and H<sub>2</sub>O<sub>2</sub> (0.2 mM) in sodium phosphate buffer pH 7.4 at  
580 25°C. The rate of the reaction was quantified by following the decrease in the  
581 absorbance of NADPH ( $\epsilon = 6220 \text{ M}^{-1} \text{ cm}^{-1}$  at 340 nm) to form NADP<sup>+</sup> which is equal  
582 to the rate of conversion of H<sub>2</sub>O<sub>2</sub> to H<sub>2</sub>O.

583

### 584 **Dynamic response of U1-Grx1-roGFP2 cells towards oxidative stress**

585 Oxidation-reduction kinetics of the Grx1-roGFP2 biosensor were measured by  
586 flow cytometry, as demonstrated earlier (15). Briefly, the basal redox state of  $1 \times 10^6$   
587 U1-Grx1-roGFP2 cells was measured, following which 50 μM H<sub>2</sub>O<sub>2</sub> was added after  
588 2 min. Biosensor oxidation and the kinetics of its subsequent recovery were  
589 monitored. Parallely, Vs was added to a set of H<sub>2</sub>O<sub>2</sub> treated cells at the point of  
590 maximum oxidation, and recovery of the biosensor in the presence of Vs was noted.  
591 After complete recovery of the cells from oxidative insult, both untreated and Vs  
592 treated cells were challenged with another bolus of 50 μM H<sub>2</sub>O<sub>2</sub>, and the biosensor  
593 dynamics were monitored by flow cytometry. Percentage oxidation of the Grx1-



594 roGFP2 biosensor was determined by equating maximal oxidation by 10 mM H<sub>2</sub>O<sub>2</sub>  
595 as 100%.

596

#### 597 **Determination of the specificity of Vs towards GSH**

598 The specificity of Vs towards GSH as cofactor was determined by modulating  
599 cellular GSH levels. U1-Grx1-roGFP2 cells were treated with 0.5 mM of BSO, an  
600 inhibitor of GSH biosynthesis, or supplemented with 7.5 or 15 mM GSH for 16 h.  
601 Following this, the cells were treated with 50 ng/μL of Vs and challenged with various  
602 H<sub>2</sub>O<sub>2</sub> concentrations for 2 min. The biosensor response in U1 cells was measured by  
603 flow cytometry.

604

#### 605 **Assessing the effect of Vs on active HIV replication.**

606 CD4<sup>+</sup> T cell line – CEM-GFP and Jurkat- and monocytic cell line U937 were  
607 infected with laboratory adapted HIV-1 strains pNL4.3 (T-tropic) and pNLAD8 (M-  
608 tropic), respectively. 0.5 × 10<sup>6</sup> untreated or Vs treated cells of each type were  
609 suspended in 500 μL of Opti MEM media and infected at multiplicity of infection (moi)  
610 0.1. The cells were incubated at 37°C for 4 h and mixed intermittently during the  
611 infection period. After 4 h, the cells were washed to remove unbound virus and  
612 supplemented with complete RPMI media with 10% FBS. Vs treatment was repeated  
613 every 24 h for Jurkat and CEM-GFP cells. CEM-GFP cells were grown till 5 days  
614 and LTR activation was assessed from day 2 to day 5 post-infection by flow  
615 cytometry. Viral replication in Jurkat and U937 cells was monitored by qRT-PCR at  
616 indicated time points.

617

618

## 619 **Nanostring gene expression analysis**

620 Expression levels of 185 genes responsive to oxidative stress and HIV  
621 infection were analysed in untreated U1 cells, U1 cells treated with PMA or Vs alone,  
622 and a combination of Vs plus PMA. The Nanostring nCounter analysis system was  
623 utilized for this purpose. Briefly, the assay was performed with 100 ng of total RNA,  
624 isolated from untreated or treated cells using the Qiagen RNeasy kit. The purity of  
625 the RNA was confirmed spectrophotometrically using Nanodrop Lite  
626 Spectrophotometer (Thermo Scientific). The nCounter probes are barcoded DNA  
627 oligonucleotides complementary to the target mRNA. Hybridization and counting  
628 were performed according to the manufacturer's protocol (52) using a customized  
629 panel of 185 genes. 6 housekeeping control genes were included in the panel. Data  
630 analysis was done using nSolver 4.0. B2M was used as an internal control due to its  
631 minimum % CV.

632

## 633 **Selenium starvation and HIV-1 reactivation**

634 U1-Grx1-roGFP2/U1 cells grown in complete RPMI medium were harvested  
635 and washed three times with serum-free RPMI to remove traces of Se. Cells were  
636 seeded in 24 well plates and incubated for 30 min, 1 h, and 2 h in serum free  
637 medium. Parallely, the cells were treated with various concentrations of Vs for 15  
638 min and cultured as mentioned above. 0.5 nM sodium selenite (Se source) was used  
639 as a positive control. Cells were harvested at indicated time points and the biosensor  
640 response was measured by flow cytometry. Viral reactivation and expression of host  
641 antioxidant genes were analysed 6 h post starvation, as mentioned earlier.

642

## 643 **Methods included in the supplementary information**

644 Dispersion of V<sub>2</sub>O<sub>5</sub> NPs, treatment of cell lines with Vs, internalization of Vs by  
645 U1, mammalian and bacterial Cell Culture, preparation of stable cell lines and  
646 validation using flow cytometry, assessment of Vs antioxidant activity and redox  
647 potential measurement, propidium iodide (PI) staining, HIV reactivation in U1 cells  
648 and qRT-PCR analysis, p24 detection by Immunoblotting and ELISA, bacterial  
649 Survival assays in U1 cells, isolation and infection of primary CD4<sup>+</sup> T cells, animal  
650 experiments with HIV-Tg mice, pulmonary edema analysis, ROS staining of lung  
651 homogenates.

652

### 653 **Statistical analysis**

654 All statistical analyses were performed using the GraphPad Prism software  
655 (Version 8.1). The data values are indicated as mean ± S.D. Statistical significance  
656 between two non-parametric test groups was determined using the Mann Whitney  
657 Rank Sum test, unless specified. Analysis of Nanostring data was performed using  
658 the nSolver platform. Differences in *P* values <0.05 were considered significant.

659

### 660 **References**

661

- 662 1. H. Wei, E. Wang, Nanomaterials with enzyme-like characteristics  
663 (nanozymes): next-generation artificial enzymes. *Chem. Soc. Rev.***42**, 6060-  
664 6093 (2013).
- 665 2. R. de la Rica, M. M. Stevens, Plasmonic ELISA for the ultrasensitive detection  
666 of disease biomarkers with the naked eye. *Nat. nanotechno.* **7**, 821-824  
667 (2012)

- 668 3. O. Salata, Applications of nanoparticles in biology and medicine. *J.*  
669 *Nanobiotechnology* **2**, 3 (2004).
- 670 4. C. Korsvik, S. Patil, S. Seal, W. T. Self, Superoxide dismutase mimetic  
671 properties exhibited by vacancy engineered ceria nanoparticles. *Chem.*  
672 *Commun. (Camb)*, 1056-1058 (2007).
- 673 5. M. Das, S. Patil, N. Bhargava, J. F. Kang, L. M. Riedel, S. Seal, J. J.  
674 Hickman, Auto-catalytic ceria nanoparticles offer neuroprotection to adult rat  
675 spinal cord neurons. *Biomaterials* **28**, 1918-1925 (2007).
- 676 6. L. Gao, Y. Liu, D. Kim, Y. Li, G. Hwang, P. C. Naha, D. P. Cormode, H. Koo,  
677 Nanocatalysts promote *Streptococcus mutans* biofilm matrix degradation and  
678 enhance bacterial killing to suppress dental caries in vivo. *Biomaterials* **101**,  
679 272-284 (2016).
- 680 7. S. Zanganeh, G. Hutter, R. Spitler, O. Lenkov, M. Mahmoudi, A. Shaw, J. S.  
681 Pajarinen, H. Nejadnik, S. Goodman, M. Moseley, L. M. Coussens, H. E.  
682 Daldrup-Link, Iron oxide nanoparticles inhibit tumour growth by inducing pro-  
683 inflammatory macrophage polarization in tumour tissues. *Nat. Nanotechnol.*  
684 **11**, 986-994 (2016).
- 685 8. A. A. Vernekar, D. Sinha, S. Srivastava, P. U. Paramasivam, P. D'Silva, G.  
686 Mugesh, An antioxidant nanozyme that uncovers the cytoprotective potential  
687 of vanadia nanowires. *Nat. Commun.* **5**, 5301 (2014).
- 688 9. A. Perl, K. Banki, Genetic and metabolic control of the mitochondrial  
689 transmembrane potential and reactive oxygen intermediate production in HIV  
690 disease. *Antioxid. Redox Signal.* **2**, 551-573 (2000).

- 691 10. F. J. Staal, M. Roederer, L. A. Herzenberg, L. A. Herzenberg, Intracellular  
692 thiols regulate activation of nuclear factor kappa B and transcription of human  
693 immunodeficiency virus. *Proc. Natl. Acad. Sci. U.S.A.* **87**, 9943-9947 (1990).
- 694 11. C. W. Pyo, Y. L. Yang, N. K. Yoo, S. Y. Choi, Reactive oxygen species  
695 activate HIV long terminal repeat via post-translational control of NF-kappaB.  
696 *Biochem. Biophys. Res. Commun.* **376**, 180-185 (2008).
- 697 12. H. P. Eck, H. Gmunder, M. Hartmann, D. Petzoldt, V. Daniel, W. Droge, Low  
698 concentrations of acid-soluble thiol (cysteine) in the blood plasma of HIV-1-  
699 infected patients. *Biol. Chem. Hoppe Seyler* **370**, 101-108 (1989).
- 700 13. R. Buhl, H. A. Jaffe, K. J. Holroyd, F. B. Wells, A. Mastrangeli, C. Saltini, A. M.  
701 Cantin, R. G. Crystal, Systemic glutathione deficiency in symptom-free HIV-  
702 seropositive individuals. *Lancet* **2**, 1294-1298 (1989).
- 703 14. L. A. Herzenberg, S. C. De Rosa, J. G. Dubs, M. Roederer, M. T. Anderson,  
704 S. W. Ela, S. C. Deresinski, L. A. Herzenberg, Glutathione deficiency is  
705 associated with impaired survival in HIV disease. *Proc. Natl. Acad. Sci. U.S.A.*  
706 **94**, 1967-1972 (1997).
- 707 15. A. Bhaskar, M. Munshi, S. Z. Khan, S. Fatima, R. Arya, S. Jameel, A. Singh,  
708 Measuring glutathione redox potential of HIV-1-infected macrophages. *J. Biol.*  
709 *Chem.* **290**, 1020-1038 (2015).
- 710 16. M. P. Look, J. K. Rockstroh, G. S. Rao, K. A. Kreuzer, S. Barton, H. Lemoch,  
711 T. Sudhop, J. Hoch, K. Stockinger, U. Spengler, T. Sauerbruch, Serum  
712 selenium, plasma glutathione (GSH) and erythrocyte glutathione peroxidase  
713 (GSH-Px)-levels in asymptomatic versus symptomatic human  
714 immunodeficiency virus-1 (HIV-1)-infection. *Eur. J. Clin. Nutr.* **51**, 266-272  
715 (1997).

- 716 17. L. Zhao, A. G. Cox, J. A. Ruzicka, A. A. Bhat, W. Zhang, E. W. Taylor,  
717 Molecular modeling and in vitro activity of an HIV-1-encoded glutathione  
718 peroxidase. *Proc. Natl. Acad. Sci. U.S.A.* **97**, 6356-6361 (2000).
- 719 18. I. Cohen, P. Boya, L. Zhao, D. Metivier, K. Andreau, J. L. Perfettini, J. G.  
720 Weaver, A. Badley, E. W. Taylor, G. Kroemer, Anti-apoptotic activity of the  
721 glutathione peroxidase homologue encoded by HIV-1. *Apoptosis* **9**, 181-192  
722 (2004); .
- 723 19. S. C. De Rosa, M. D. Zaretsky, J. G. Dubs, M. Roederer, M. Anderson, A.  
724 Green, D. Mitra, N. Watanabe, H. Nakamura, I. Tjioe, S. C. Deresinski, W. A.  
725 Moore, S. W. Ela, D. Parks, L. A. Herzenberg, L. A. Herzenberg, N-  
726 acetylcysteine replenishes glutathione in HIV infection. *Eur. J. Clin. Invest.* **30**,  
727 915-929 (2000).
- 728 20. A. Witschi, E. Junker, C. Schranz, R. F. Speck, B. H. Lauterburg,  
729 Supplementation of N-acetylcysteine fails to increase glutathione in  
730 lymphocytes and plasma of patients with AIDS. *AIDS Res. Hum. Retroviruses*  
731 **11**, 141-143 (1995).
- 732 21. C. Sappey, S. Legrand-Poels, M. Best-Belpomme, A. Favier, B. Rentier, J.  
733 Piette, Stimulation of glutathione peroxidase activity decreases HIV type 1  
734 activation after oxidative stress. *AIDS Res. Hum. Retroviruses* **10**, 1451-1461  
735 (1994).
- 736 22. P. A. Sandstrom, J. Murray, T. M. Folks, A. M. Diamond, Antioxidant defenses  
737 influence HIV-1 replication and associated cytopathic effects. *Free Radic.*  
738 *Biol. Med.* **24**, 1485-1491 (1998).

- 739 23. C. Cao, Y. Leng, W. Huang, X. Liu, D. Kufe, Glutathione peroxidase 1 is  
740 regulated by the c-Abl and Arg tyrosine kinases. *J. Biol. Chem.* **278**, 39609-  
741 39614 (2003).
- 742 24. T. Wiedenmann, N. Dietrich, T. Fleming, S. Altamura, L. E. Deelman, R. H.  
743 Henning, M. U. Muckenthaler, P. P. Nawroth, H. P. Hammes, A. H. Wagner,  
744 M. Hecker, Modulation of glutathione peroxidase activity by age-dependent  
745 carbonylation in glomeruli of diabetic mice. *J. Diabetes Complications* **32**,  
746 130-138 (2018).
- 747 25. W. H. Yang, S. Y. Park, S. Ji, J. G. Kang, J. E. Kim, H. Song, I. Mook-Jung, K.  
748 M. Choe, J. W. Cho, O-GlcNAcylation regulates hyperglycemia-induced GPX1  
749 activation. *Biochem. Biophys. Res. Commun.* **391**, 756-761 (2010).
- 750 26. S. Ghosh, P. Roy, N. Karmodak, E. D. Jemmis, G. Mugesh, Nanoisozymes:  
751 Crystal-Facet-Dependent Enzyme-Mimetic Activity of V<sub>2</sub>O<sub>5</sub> Nanomaterials.  
752 *Angewandte Chemie* **57**, 4510-4515 (2018).
- 753 27. J. R. Morones, J. L. Elechiguerra, A. Camacho, K. Holt, J. B. Kouri, J. T.  
754 Ramirez, M. J. Yacaman, The bactericidal effect of silver nanoparticles.  
755 *Nanotechnology* **16**, 2346-2353 (2005).
- 756 28. W. Jiang, B. Y. Kim, J. T. Rutka, W. C. Chan, Nanoparticle-mediated cellular  
757 response is size-dependent. *Nat. Nanotechnol.* **3**, 145-150 (2008).
- 758 29. Y. Pan, S. Neuss, A. Leifert, M. Fischler, F. Wen, U. Simon, G. Schmid, W.  
759 Brandau, W. Jahnen-Dechent, Size-dependent cytotoxicity of gold  
760 nanoparticles. *Small* **3**, 1941-1949 (2007).
- 761 30. M. Auffan, J. Rose, J. Y. Bottero, G. V. Lowry, J. P. Jolivet, M. R. Wiesner,  
762 Towards a definition of inorganic nanoparticles from an environmental, health  
763 and safety perspective. *Nat. Nanotechnol.* **4**, 634-641 (2009).

- 764 31. X. Zhou, W. Xu, G. Liu, D. Panda, P. Chen, Size-dependent catalytic activity  
765 and dynamics of gold nanoparticles at the single-molecule level. *J. Am.*  
766 *Chem. Soc.* **132**, 138-146 (2010).
- 767 32. B. Zhou, D. He, Raman spectrum of vanadium pentoxide from  
768 density-functional perturbation theory. *J. Raman Spectrosc.* **39**, 1475-1481  
769 (2008).
- 770 33. W. Avansi, J. L. Q. Maia, C. Ribeiro, E. R. Leite, V. R. Mastelaro, Local  
771 structure study of vanadium pentoxide 1D-nanostructures. *J. Nanopart. Res.*  
772 **13**, (2011).
- 773 34. C. Sanchez, J. Livage, G. Lucazeau, Infrared and Raman study of amorphous  
774  $V_2O_5$ . *J. Raman Spectrosc.* **12**, 68-72 (1982).
- 775 35. T. M. Folks, J. Justement, A. Kinter, C. A. Dinarello, A. S. Fauci, Cytokine-  
776 induced expression of HIV-1 in a chronically infected promonocyte cell line.  
777 *Science* **238**, 800-802 (1987).
- 778 36. G. Poli, A. Kinter, J. S. Justement, J. H. Kehrl, P. Bressler, S. Stanley, A. S.  
779 Fauci, Tumor necrosis factor alpha functions in an autocrine manner in the  
780 induction of human immunodeficiency virus expression. *Proc. Natl. Acad. Sci.*  
781 *U.S.A.* **87**, 782-785 (1990).
- 782 37. M. Gutscher, A. L. Pauleau, L. Marty, T. Brach, G. H. Wabnitz, Y. Samstag, A.  
783 J. Meyer, T. P. Dick, Real-time imaging of the intracellular glutathione redox  
784 potential. *Nat. Methods* **5**, 553-559 (2008).
- 785 38. B. Morgan, M. C. Sobotta, T. P. Dick, Measuring E(GSH) and  $H_2O_2$  with  
786 roGFP2-based redox probes. *Free Radic. Biol. Med.* **51**, 1943-1951 (2011).



- 787 39. M. Gutscher, M. C. Sobotta, G. H. Wabnitz, S. Ballikaya, A. J. Meyer, Y.  
788 Samstag, T. P. Dick, Proximity-based protein thiol oxidation by H<sub>2</sub>O<sub>2</sub>-  
789 scavenging peroxidases. *J. Biol. Chem.* **284**, 31532-31540 (2009).
- 790 40. R. Brigelius-Flohe, M. Maiorino, Glutathione peroxidases. *Biochim. Biophys.*  
791 *Acta* **1830**, 3289-3303 (2013).
- 792 41. R. Drew, J. O. Miners, The effects of buthionine sulphoximine (BSO) on  
793 glutathione depletion and xenobiotic biotransformation. *Biochemical*  
794 *Pharmacology* **33**, 2989-2994 (1984).
- 795 42. S. Legrand-Poels, D. Vaira, J. Pincemail, A. van de Vorst, J. Piette, Activation  
796 of human immunodeficiency virus type 1 by oxidative stress. *AIDS Res. Hum.*  
797 *Retroviruses* **6**, 1389-1397 (1990).
- 798 43. C. H. Kim, S. Gollapudi, A. Kim, T. Lee, S. Gupta, Role of protein kinase C-  
799 beta isozyme in activation of latent human immunodeficiency virus type 1 in  
800 promonocytic U1 cells by phorbol-12-myristate acetate. *AIDS Res. Hum.*  
801 *Retroviruses* **12**, 1361-1366 (1996).
- 802 44. R. J. Gulakowski, J. B. McMahon, R. W. Buckheit, Jr., K. R. Gustafson, M. R.  
803 Boyd, Antireplicative and anticytopathic activities of prostratin, a non-tumor-  
804 promoting phorbol ester, against human immunodeficiency virus (HIV).  
805 *Antiviral Res.* **33**, 87-97 (1997).
- 806 45. A. Campa, G. Shor-Posner, F. Indacochea, G. Zhang, H. Lai, D. Asthana, G.  
807 B. Scott, M. K. Baum, Mortality risk in selenium-deficient HIV-positive children.  
808 *J. Acquir. Immune Defic. Syndr. Hum. Retrovirol.* **20**, 508-513 (1999).
- 809 46. M. P. Look, J. K. Rockstroh, G. S. Rao, K. A. Kreuzer, U. Spengler, T.  
810 Sauerbruch, Serum selenium versus lymphocyte subsets and markers of

- 811 disease progression and inflammatory response in human immunodeficiency  
812 virus-1 infection. *Biol. Trace Elem. Res.* **56**, 31-41 (1997).
- 813 47. A. Gervaix, D. West, L. M. Leoni, D. D. Richman, F. Wong-Staal, J. Corbeil, A  
814 new reporter cell line to monitor HIV infection and drug susceptibility in vitro.  
815 *Proc. Natl. Acad. Sci. U.S.A.* **94**, 4653-4658 (1997).
- 816 48. P. Tyagi, V. K. Pal, R. Agrawal, S. Singh, S. Srinivasan, A. Singh,  
817 *Mycobacterium tuberculosis* Reactivates HIV-1 via Exosome-Mediated  
818 Resetting of Cellular Redox Potential and Bioenergetics. *mBio* **11**, (2020).
- 819 49. E. P. Amaral, E. L. Conceicao, D. L. Costa, M. S. Rocha, J. M. Marinho, M.  
820 Cordeiro-Santos, M. R. D'Imperio-Lima, T. Barbosa, A. Sher, B. B. Andrade,  
821 N-acetyl-cysteine exhibits potent anti-mycobacterial activity in addition to its  
822 known anti-oxidative functions. *BMC Microbiol.* **16**, 251 (2016).
- 823 50. G. Teskey, R. Cao, H. Islamoglu, A. Medina, C. Prasad, R. Prasad, A.  
824 Sathananthan, M. Fraix, S. Subbian, L. Zhong, V. Venketaraman, The  
825 Synergistic Effects of the Glutathione Precursor, NAC and First-Line  
826 Antibiotics in the Granulomatous Response Against *Mycobacterium*  
827 *tuberculosis*. *Front. Immunol.* **9**, 2069 (2018).
- 828 51. D. Kumar, L. Nath, M. A. Kamal, A. Varshney, A. Jain, S. Singh, K. V. Rao,  
829 Genome-wide analysis of the host intracellular network that regulates survival  
830 of *Mycobacterium tuberculosis*. *Cell* **140**, 731-743 (2010).
- 831 52. M. M. Kulkarni, Digital multiplexed gene expression analysis using the  
832 NanoString nCounter system. *Curr. Protoc. Mol. Biol.* **Chapter 25**, Unit25B 10  
833 (2011).
- 834 53. R. Eid, E. Boucher, N. Gharib, C. Khoury, N. T. Arab, A. Murray, P. G. Young,  
835 C. A. Mandato, M. T. Greenwood, Identification of human ferritin, heavy

- 836 polypeptide 1 (FTH1) and yeast RGI1 (YER067W) as pro-survival sequences  
837 that counteract the effects of Bax and copper in *Saccharomyces cerevisiae*.  
838 *Exp. Cell. Res.* **342**, 52-61 (2016).
- 839 54. H. Sato, A. Shiiya, M. Kimata, K. Maebara, M. Tamba, Y. Sakakura, N.  
840 Makino, F. Sugiyama, K. Yagami, T. Moriguchi, S. Takahashi, S. Bannai,  
841 Redox imbalance in cystine/glutamate transporter-deficient mice. *J. Biol.*  
842 *Chem.* **280**, 37423-37429 (2005).
- 843 55. C. Espinosa-Diez, V. Miguel, D. Mennerich, T. Kietzmann, P. Sanchez-Perez,  
844 S. Cadenas, S. Lamas, Antioxidant responses and cellular adjustments to  
845 oxidative stress. *Redox biology* **6**, 183-197 (2015).
- 846 56. K. A. Roebuck, D. S. Gu, M. F. Kagnoff, Activating protein-1 cooperates with  
847 phorbol ester activation signals to increase HIV-1 expression. *AIDS* **10**, 819-  
848 826 (1996).
- 849 57. A. J. Henderson, K. L. Calame, CCAAT/enhancer binding protein (C/EBP)  
850 sites are required for HIV-1 replication in primary macrophages but not  
851 CD4(+) T cells. *Proc. Natl. Acad. Sci. U.S.A.* **94**, 8714-8719 (1997).
- 852 58. R. Hu, N. Oyaizu, S. Than, V. S. Kalyanaraman, X. P. Wang, S. Pahwa, HIV-1  
853 gp160 induces transforming growth factor-beta production in human PBMC.  
854 *Clin. Immunol. Immunopathol.* **80**, 283-289 (1996).
- 855 59. G. Herbein, U. Mahlknecht, F. Batliwalla, P. Gregersen, T. Pappas, J. Butler,  
856 W. A. O'Brien, E. Verdin, Apoptosis of CD8+ T cells is mediated by  
857 macrophages through interaction of HIV gp120 with chemokine receptor  
858 CXCR4. *Nature* **395**, 189-194 (1998).
- 859 60. C. Amiel, E. Darcissac, M. J. Truong, J. Dewulf, M. Loyens, Y. Mouton, A.  
860 Capron, G. M. Bahr, Interleukin-16 (IL-16) inhibits human immunodeficiency

- 861 virus replication in cells from infected subjects, and serum IL-16 levels drop  
862 with disease progression. *J. Infect. Dis.* **179**, 83-91 (1999)
- 863 61. W. Choe, D. J. Volsky, M. J. Potash, Induction of rapid and extensive beta-  
864 chemokine synthesis in macrophages by human immunodeficiency virus type  
865 1 and gp120, independently of their coreceptor phenotype. *J. Virol.* **75**, 10738-  
866 10745 (2001)
- 867 62. S. Z. Khan, N. Hand, S. L. Zeichner, Apoptosis-induced activation of HIV-1 in  
868 latently infected cell lines. *Retrovirology* **12**, 42 (2015).
- 869 63. K. Devadas, N. J. Hardegen, L. M. Wahl, I. K. Hewlett, K. A. Clouse, K. M.  
870 Yamada, S. Dhawan, Mechanisms for Macrophage-Mediated HIV-1  
871 Induction. *J. Immunol.* **173 (11)**, 6735-6744 (2004).
- 872 64. P. Dickie, J. Felser, M. Eckhaus, J. Bryant, J. Silver, N. Marinos, A. L.  
873 Notkins, HIV-associated nephropathy in transgenic mice expressing HIV-1  
874 genes. *Virology* **185**, 109-119 (1991).
- 875 65. B. A. Jacob, K. M. Porter, S. C. Elms, P. Y. Cheng, D. P. Jones, R. L. Sutliff,  
876 HIV-1-induced pulmonary oxidative and nitrosative stress: exacerbated  
877 response to endotoxin administration in HIV-1 transgenic mouse model. *Am.*  
878 *J. Physiol. Lung. Cell. Mol. Physiol.* **291**, L811-819 (2006).
- 879 66. J. B. Kopp, M. E. Klotman, S. H. Adler, L. A. Bruggeman, P. Dickie, N. J.  
880 Marinos, M. Eckhaus, J. L. Bryant, A. L. Notkins, P. E. Klotman, Progressive  
881 glomerulosclerosis and enhanced renal accumulation of basement membrane  
882 components in mice transgenic for human immunodeficiency virus type 1  
883 genes. *Proc. Natl. Acad. Sci. U.S.A.* **89**, 1577-1581 (1992).
- 884 67. S. G. Deeks, R. Tracy, D. C. Douek, Systemic effects of inflammation on  
885 health during chronic HIV infection. *Immunity* **39**, 633-645 (2013).

- 886 68. S. Ghosh, Prasad, S. , Mugesh, G., Understanding the role of oxo and  
887 peroxido species in the glutathione peroxidase (GPx)-like activity of metal  
888 based nanozymes. *Inorganica Chimica Acta* **484**, 283-290 (2019).
- 889 69. V. N. Gladyshev, T. C. Stadtman, D. L. Hatfield, K. T. Jeang, Levels of major  
890 selenoproteins in T cells decrease during HIV infection and low molecular  
891 mass selenium compounds increase. *Proc. Natl. Acad. Sci. U.S.A.* **96**, 835-  
892 839 (1999).
- 893 70. J. Q. Wu, T. R. Sasse, G. Wolkenstein, V. Conceicao, M. M. Saksena, M.  
894 Soedjono, S. S. Perera, B. Wang, D. E. Dwyer, N. K. Saksena, Transcriptome  
895 analysis of primary monocytes shows global down-regulation of genetic  
896 networks in HIV viremic patients versus long-term non-progressors. *Virology*  
897 **435**, 308-319 (2013)
- 898 71. S. Y. Lee, Y. K. Park, C. H. Yoon, K. Kim, K. C. Kim, Meta-analysis of gene  
899 expression profiles in long-term non-progressors infected with HIV-1. *BMC*  
900 *Med. Genomics* **12**, 3 (2019)
- 901 72. L. L. Zhang, Z. N. Zhang, X. Wu, Y. J. Jiang, Y. J. Fu, H. Shang,  
902 Transcriptomic meta-analysis identifies gene expression characteristics in  
903 various samples of HIV-infected patients with nonprogressive disease. *J.*  
904 *Transl. Med.* **15**, 191 (2017).
- 905 73. R. Mishra, S. Kohli, N. Malhotra, P. Bandyopadhyay, M. Mehta, M. Munshi, V.  
906 Adiga, V. K. Ahuja, R. K. Shandil, R. S. Rajmani, A. S. N. Seshasayee, A.  
907 Singh, Targeting redox heterogeneity to counteract drug tolerance in  
908 replicating *Mycobacterium tuberculosis*. *Sci. Transl. Med.* **11**, (2019).
- 909 74. E. P. Amaral, D. L. Costa, S. Namasivayam, N. Riteau, O. Kamenyeva, L.  
910 Mittereder, K. D. Mayer-Barber, B. B. Andrade, A. Sher, A major role for

- 911 ferroptosis in *Mycobacterium tuberculosis*-induced cell death and tissue  
912 necrosis. *J. Exp. Med.* **216**, 556-570 (2019).
- 913 75. L. Xu, Y. Liu, Z. Chen, W. Li, Y. Liu, L. Wang, Y. Liu, X. Wu, Y. Ji, Y. Zhao, L.  
914 Ma, Y. Shao, C. Chen, Surface-engineered gold nanorods: promising DNA  
915 vaccine adjuvant for HIV-1 treatment. *Nano letters* **12**, 2003-2012 (2012).
- 916 76. M. C. Bowman, T. E. Ballard, C. J. Ackerson, D. L. Feldheim, D. M. Margolis,  
917 C. Melander, Inhibition of HIV fusion with multivalent gold nanoparticles. *J*  
918 *Am. Chem. Soc.* **130**, 6896-6897 (2008).
- 919 77. H. H. Lara, N. V. Ayala-Nunez, L. Ixtepan-Turrent, C. Rodriguez-Padilla,  
920 Mode of antiviral action of silver nanoparticles against HIV-1. *J.*  
921 *nanobiotechnology* **8**, 1 (2010).
- 922 78. H. H. Lara, N. V Ayala-Núñez, L. C. I. Turrent, C. R. Padilla, Bactericidal  
923 effect of silver nanoparticles against multidrug-resistant bacteria. *World*  
924 *Journal of Microbiology and Biotechnology* **26**, 615-621 (2010).
- 925
- 926 79. Mandas A, Iorio EL, Congiu MG, Balestrieri C, Mereu A, Cau D, Dessì S,  
927 Curreli N. Oxidative imbalance in HIV-1 infected patients treated with  
928 antiretroviral therapy. *J Biomed Biotechnol.* (2009).
- 929 80. M. M. Elsheikh, Y. Tang, D. Li, G. Jiang, Deep latency: A new insight into a  
930 functional HIV cure. *EBioMedicine* **45**, 624-629 (2019).
- 931 81. J. Mendialdua, R. Casanova, Y. Barbaux, XPS studies of V<sub>2</sub>O<sub>5</sub>, V<sub>6</sub>O<sub>13</sub>, VO<sub>2</sub>  
932 and V<sub>2</sub>O<sub>3</sub>. *J. Electron Spectrosc. Relat. Phenom.* **71**, 249-261 (1995).
- 933 82. E. Hryha, E. Rutqvist, L. Nyborg, Stoichiometric vanadium oxides studied by  
934 XPS. *Surf. Interface Anal.* **44** 1022-1025 (2012).
- 935

936 **Acknowledgements**

937 This work was supported by Wellcome Trust-Department of Biotechnology (DBT)  
938 India Alliance grant IA/S/16/2/502700 (A.S.) and in part by DBT grants  
939 BT/PR11911/BRB/10/1327/2014, BT/PR13522/COE/34/27/2015 and  
940 BT/HRD/NBA/39/07/2018-19 (A.S.), DBT-IISc Partnership Program grant 22-0905-  
941 0006-05-987 436, and the Infosys Foundation. A.S. is a senior fellow of Wellcome  
942 Trust-DBT India Alliance. G. M. acknowledges the DST Nano Mission (SR/NM/NS-  
943 1380/2014) and SERB (SB/S2/JCB-067/2015), DST, New Delhi for funding. SS and  
944 SG acknowledge fellowships from the University Grants Commission (UGC) and  
945 Indian Institute of Science (IISc) respectively. We thank Dr. Amit A. Vernekar for  
946 helpful discussions. We gratefully acknowledge the NanoString services provided by  
947 TheraCUES Innovations Pvt Ltd, Bangalore. We also thank the AFMM Facility,  
948 CeNSE, IISc for the microscopic and spectroscopic facilities.

949



950 **Figures**

951 **Figure 1**

952

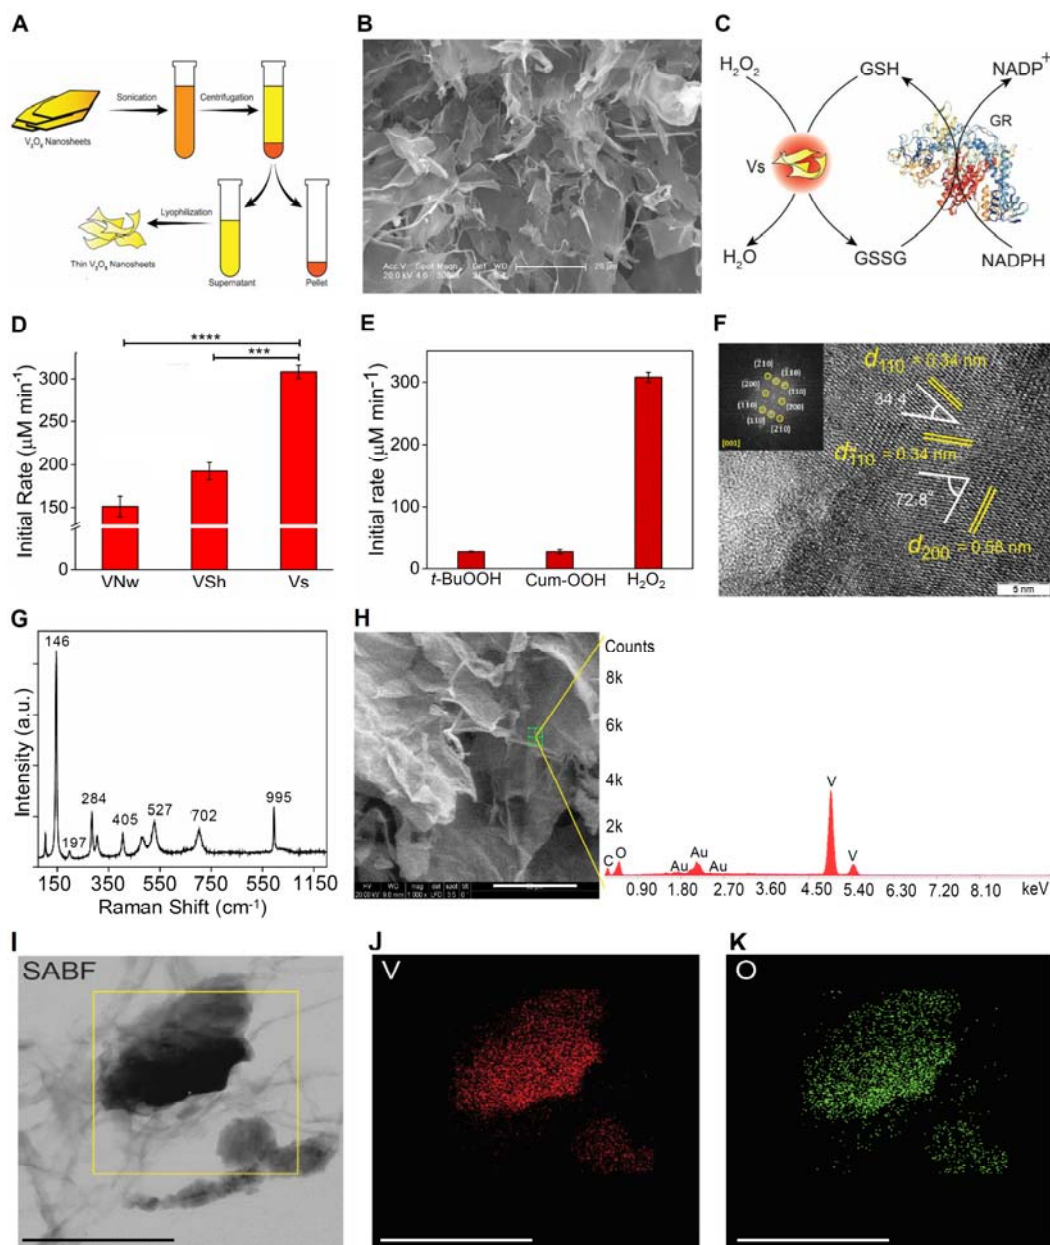

953

954 **Figure 1. Synthesis and characterization of vanadia (V<sub>2</sub>O<sub>5</sub>) nanoparticles. (A)**

955 Schematic representation of the synthesis of thin V<sub>2</sub>O<sub>5</sub> nanosheets (Vs) from VSh.

956 **(B)** SEM image of thin-nanosheets (Vs), scale – 20 μm. **(C)** Schematic representing



957 the glutathione reductase (GR)-coupled assay to measure the GPX-like activity of  
958 Vs. **(D)** Comparison of initial activity rate among all three forms of  $V_2O_5$   
959 nanomaterials having a common exposed facet [001]. \*\*\*  $P < 0.001$ , \*\*\*\*  $P < 0.0001$  by  
960 Student's *t* test. Data is representative of three independent experiment (mean  $\pm$ SD).  
961 **(E)** Bar diagram of the initial rate of Vs with 3 different peroxides, *t*-BuOOH – tertiary-  
962 butyl hydroperoxide, Cum-OOH – cumene hydroperoxide and  $H_2O_2$ . **(F)** High-  
963 resolution TEM (HRTEM) and fast Fourier transform (FFT) (inset) of Vs showing the  
964 lattice fringes and the exposed plane. **(G)** FT-Raman spectroscopy of Vs showing  
965 the peaks corresponding to the orthorhombic phase of the material. **(H)** Energy  
966 dispersive spectroscopy (EDS) of Vs. The small peak at 2.0 KeV is due to Au  
967 spurring while recording the spectra (Scale – 50  $\mu$ m). The peak of C is coming from  
968 atmospheric carbon. X-Ray mapping images of Vs (Scale – 300 nm). **(I)** Left column:  
969 Selective area bright field (SABF) image, **(J)** middle column: distribution of vanadium  
970 (V) atoms in red, **(K)** right column: distribution of oxygen ( $O_2$ ) atoms in green.

971

972

973

974 **Figure 2**

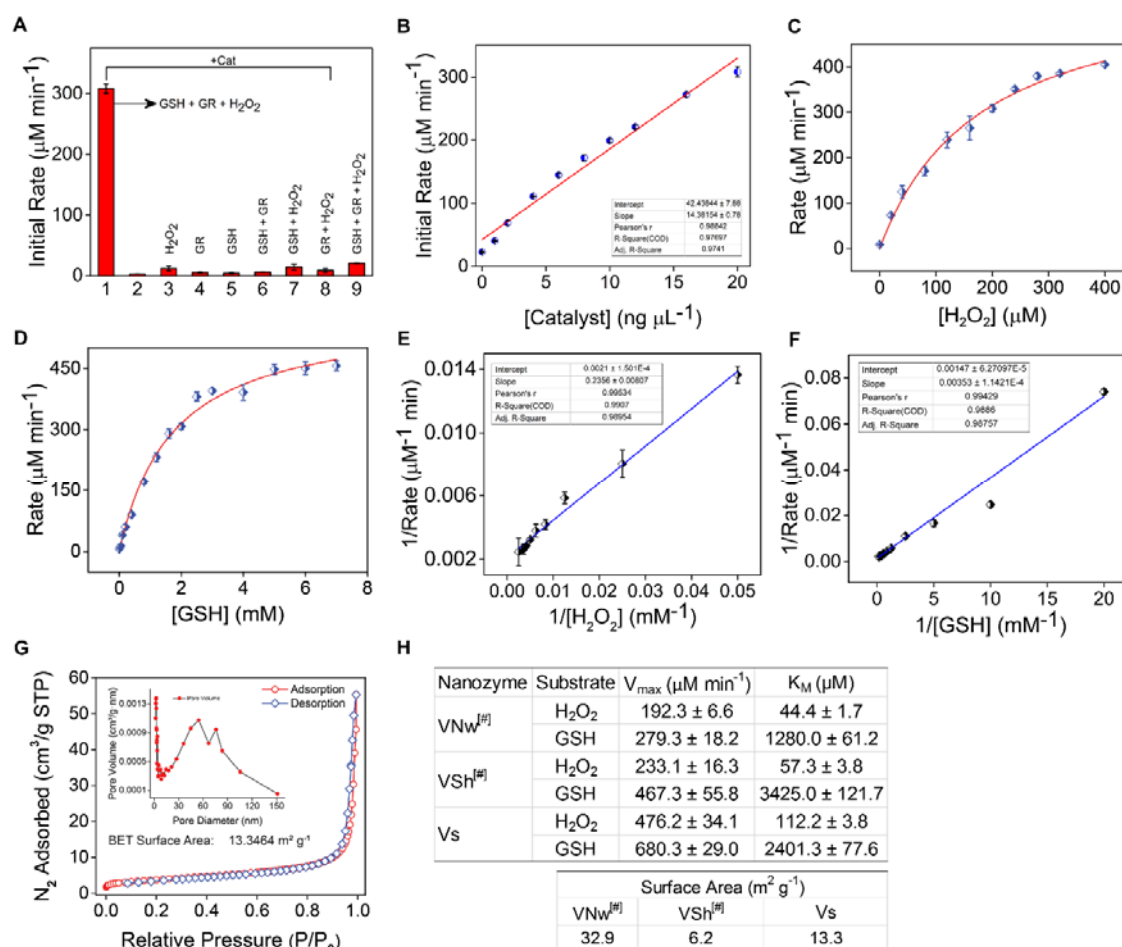

975

976 **Figure 2. Enzymatic parameters and surface area measurements of Vs. (A)** Bar  
 977 diagram shows the initial rate of GPX-like activity of Vs under different assay  
 978 conditions. **(B)** Dependence of the initial reaction rate for H<sub>2</sub>O<sub>2</sub> reduction on varying  
 979 concentration of the catalyst, Vs. **(C)** Michaelis–Menten plot with the variation of  
 980 H<sub>2</sub>O<sub>2</sub> (0–400  $\mu\text{M}$ ) in the presence of Vs (20 ng/ $\mu\text{L}$ ), GSH (2 mM), NADPH (0.2 mM),  
 981 GR (1.7 units) in phosphate buffer (100 mM, pH 7.4) at 25°C. **(D)** Michaelis–Menten  
 982 plot with the variation of GSH (0–7 mM) in the presence of Vs (20 ng/ $\mu\text{L}$ ), H<sub>2</sub>O<sub>2</sub> (200  
 983  $\mu\text{M}$ ), NADPH (0.2 mM), GR (1.7 units) in phosphate buffer (100 mM, pH 7.4) at  
 984 25°C. **(E)** and **(F)** Lineweaver-Burk plot with varying concentration of H<sub>2</sub>O<sub>2</sub> and GSH  
 985 in presence of Vs nanozyme respectively. The concentration of NADPH was

986 constant (0.2 mM) in all the assay conditions. **(G)** Surface area measurement by N<sub>2</sub>  
987 adsorption, desorption isotherm and distribution of pore size (Inset). The measured  
988 surface area of Vs was 13.3 m<sup>2</sup>/g. **(H)** Enzyme kinetic parameters and BET surface  
989 area values of different forms of V<sub>2</sub>O<sub>5</sub> nanomaterials <sup>#</sup> reported from our previous  
990 literature (26).

991

992

993 **Figure 3**

994

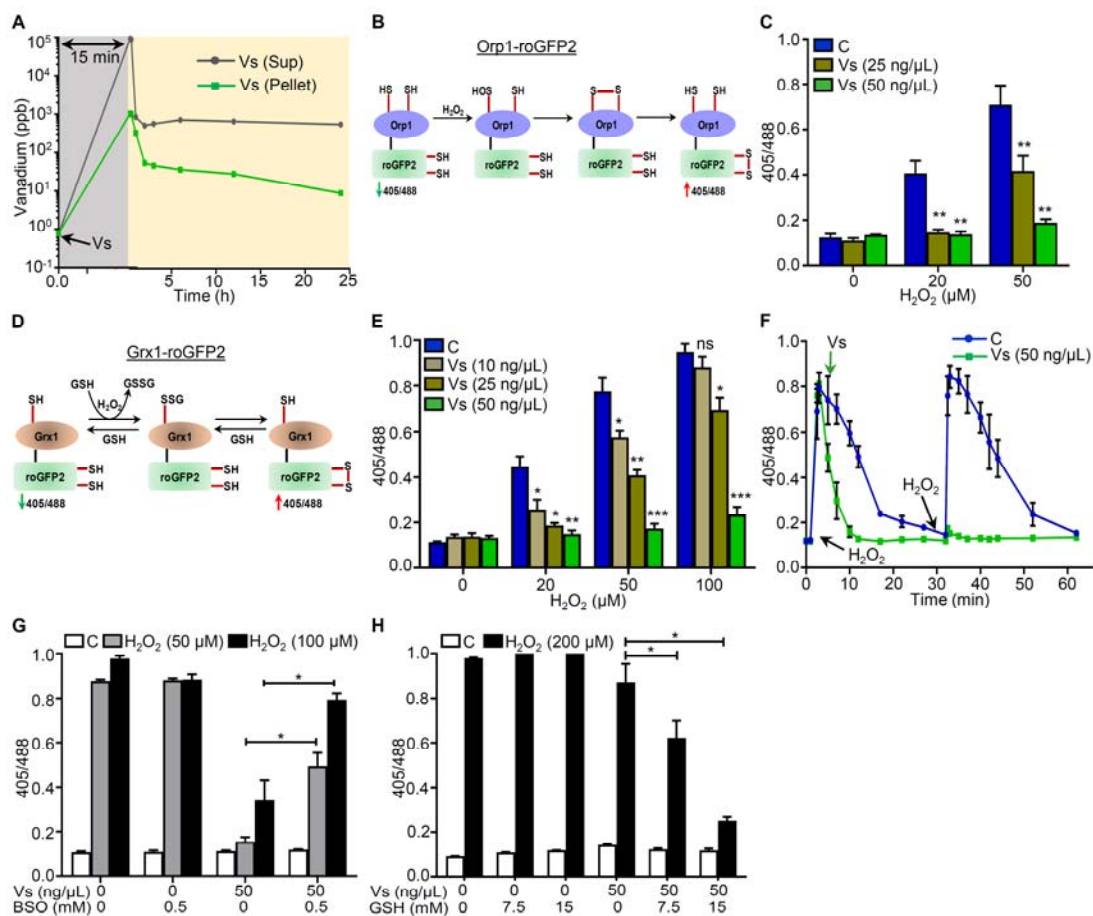

995

996 **Figure 3. Vs acts as a mimic of GPX in U1 cells. (A)** U1 cells were treated with 50

997 ng/μL of Vs for 15 min (grey area), washed, and kinetics of Vs retention (yellow area)

998 was quantified by measuring cellular and extra-cellular Vs content using ICP-MS.

999 **(B)** Schematic representation showing working principle of Orp1-roGFP2 biosensor.

1000 **(C)** U1-Orp1-roGFP2 cells were treated with Vs for 15 min, followed by exposure to

1001 H<sub>2</sub>O<sub>2</sub> for 2 min, and ratiometric response was measured. **(D)** Schematic

1002 representation showing working principle of Grx1-roGFP2 biosensor. **(E)** U1-Grx1-

1003 roGFP2 cells were pre-treated with Vs for 15 min, exposed to H<sub>2</sub>O<sub>2</sub> for 2 min, and

1004 ratiometric response was measured. **(F)** U1-Grx1-roGFP2 cells were treated with two

1005 doses of 50  $\mu$ M H<sub>2</sub>O<sub>2</sub> (indicated by the arrows) and the ratiometric response was  
1006 measured (blue line). Parallely, U1 cells treated similarly with H<sub>2</sub>O<sub>2</sub> were exposed to  
1007 Vs at the indicated time point and the ratiometric response was measured (green  
1008 line). \*\*\*\*P<0.0001, by Wilcoxon matched-pairs signed rank test. **(G)** and **(H)** U1  
1009 Grx1-roGFP2 cells were supplemented with BSO or GSH for 16 h to deplete or  
1010 replenish GSH, respectively. Following this, cells were treated with Vs for 15 min,  
1011 exposed to H<sub>2</sub>O<sub>2</sub>, and the ratiometric response was measured. \*\*\*\* P<0.0001, \*\*\*  
1012 P<0.001, \*\* P<0.01, \* P<0.05, by Mann Whitney Test. Asterisks (\*) compare Vs  
1013 treated cells with control cells (C). Data are representative of results from three  
1014 independent experiments performed in triplicate (mean  $\pm$  SEM).  
1015  
1016

1017 **Figure 4**

1018

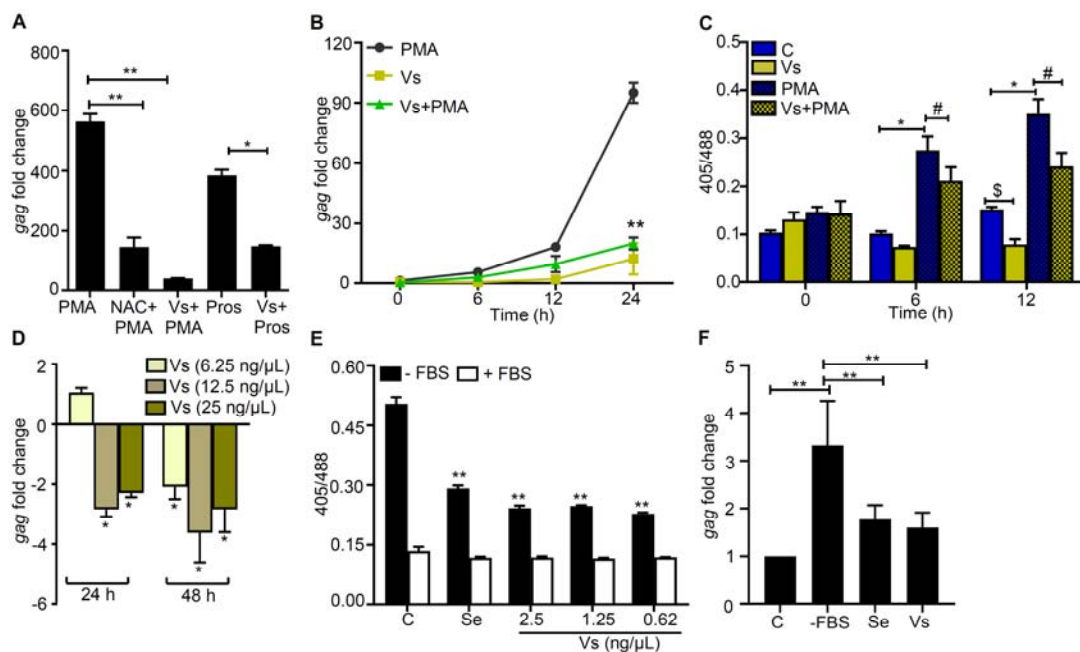

1019

1020

1021 **Figure 4. Vs subverts HIV reactivation.** (A) Vs-treated U1 cells were challenged  
 1022 with 5 ng/mL PMA or 1.25 μM prostratin (Pros) for 24 h and HIV-1 induction was  
 1023 monitored by *gag* RT-PCR. 10 mM NAC, an antioxidant known to subvert PMA  
 1024 mediated viral reactivation, was used as a positive control. (B) Vs-treated U1 cells  
 1025 were exposed to PMA and viral activation was measured as a function of time, by  
 1026 *gag* RT-PCR. U1 cells were also treated with Vs or PMA alone. (C) Untreated or Vs-  
 1027 treated U1-Orp1-roGFP2 cells were exposed to PMA and the biosensor response  
 1028 was measured at the indicated time points. The biosensor response was also  
 1029 measured for untreated or PMA treated cells. (D) J1.1 cells were treated twice with  
 1030 Vs for 15 min at 0 and 24 h time point. HIV-1 induction was measured by *gag* RT-  
 1031 PCR at 24 h and 48 h post-treatment. An untreated control was used for  
 1032 normalization. (E) U1-Grx1-roGFP2 cells were serum starved for 30 min in the

1033 presence or absence of Vs and sodium selenite (0.5 nM), and the biosensor  
1034 response was measured. Data were compared to serum starved control cells (C). **(F)**  
1035 U1 cells were either serum-starved or supplemented with Se (0.5 nM) or Vs (0.62  
1036 ng/ $\mu$ L) and HIV reactivation was measured at 6 h post starvation by *gag* RT-PCR.  
1037 \*\*P<0.01, \$/#\*P<0.05, by Mann Whitney Test. Data are representative of results  
1038 from three independent experiments performed in triplicate (mean  $\pm$  SD).

1039

1040

1041 **Figure 5**

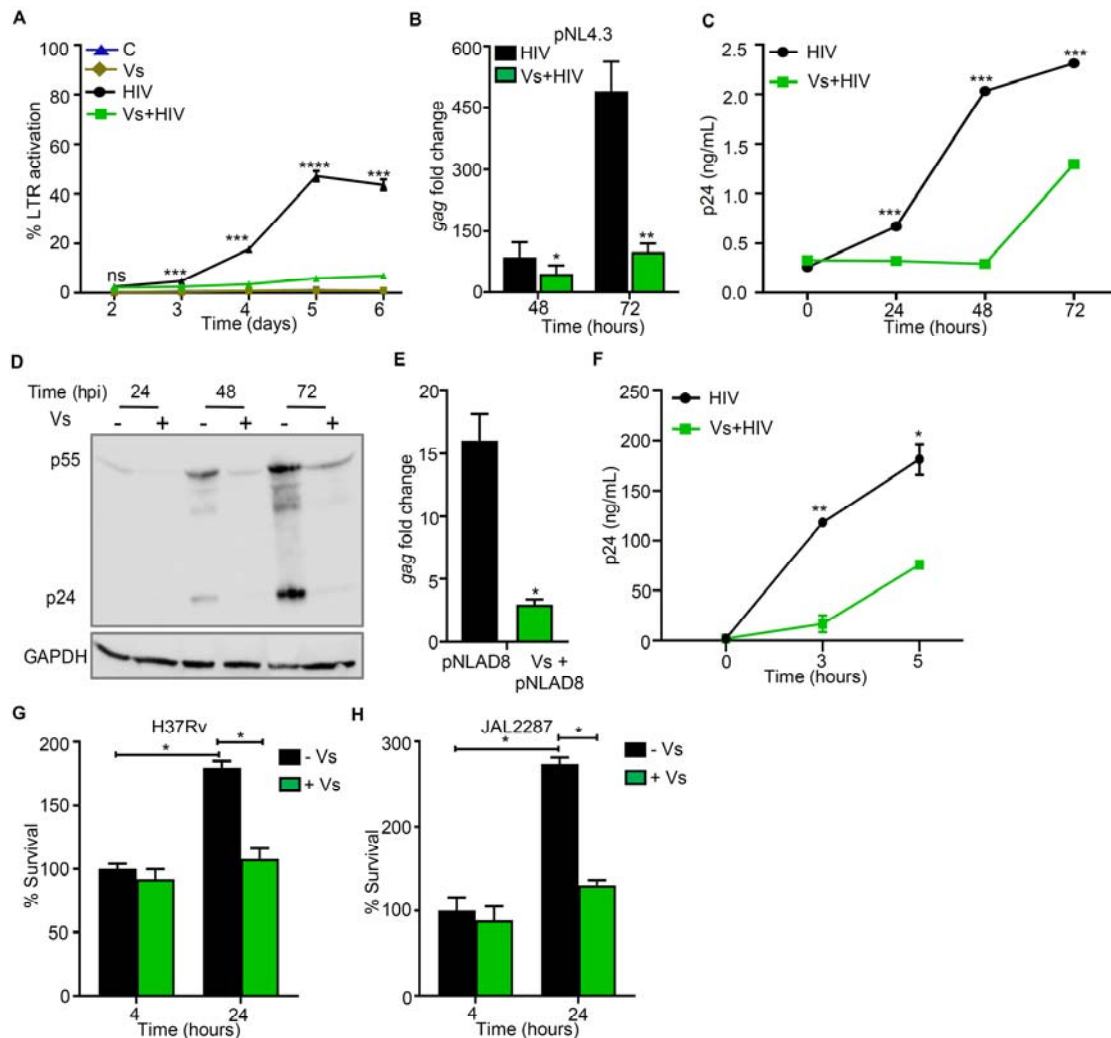

1042

1043 **Figure 5. Vs reduces replication of HIV-1 and *Mtb*.** (A) CEM-GFP cells were pre-  
 1044 treated with 50 ng/ $\mu$ L of Vs for 15 min and infected with 0.1 moi of T-tropic HIV-1  
 1045 provirus (pNL4.3) and GFP fluorescence was measured by at 488 nm as an indicator  
 1046 of HIV LTR activity. Vs treatment was repeated every 24 h for the experiment. A  
 1047 similar assay was performed using Jurkat (CD4<sup>+</sup> T cell line) and viral replication was  
 1048 assessed by (B) *gag* RT PCR, (C) p24 ELISA in the culture supernatant, and (D)  
 1049 immunoblotting for p24 (viral capsid protein) in the whole cell lysate. (E) U937



1050 (promonocytes) were pre-treated with 50 ng/μL of Vs for 15 min followed by infection  
1051 with 1 moi of M-tropic HIV pro-virus (pNLAD8) and viral activation was measured by  
1052 *gag* qRT-PCR at 24 h post-infection (hpi). **(F)** Primary CD4<sup>+</sup> T cells purified from  
1053 human PBMCs were activated, pre-treated with 25 ng/μL Vs for 15 min, and infected  
1054 with 0.1 moi of T-tropic HIV-1 provirus (pNL4.3). Virus released in supernatant was  
1055 quantified by p24 ELISA. Vs treatment was repeated every 48 h. Data analysed by  
1056 Student's *t* test (mean ± SD). **(G and H)** U1 macrophages pre-treated with 50 ng/μL  
1057 Vs were infected with drug-sensitive *Mtb* H37Rv or multidrug-resistant JAL2287  
1058 strains and bacterial survival was evaluated by enumerating colony forming units  
1059 (CFUs). Percent survival was calculated by normalizing with CFUs derived from *Mtb*  
1060 infected Vs-untreated U1 at 4 hpi. All figures except **(A)** and **(C)** were analysed by  
1061 Mann Whitney test. **(A)** and **(C)** were analysed by 2-way ANOVA with Tukeys  
1062 multiple comparison test. \*\*\*\* P<0.0001, \*\*\* P<0.001, \* P<0.05. Data are  
1063 representative of results from three independent experiments performed in triplicate  
1064 (mean ± SD).

1065

1066

1067

1068

1069

1070

1071

1072

1073

1074

1075 **Figure 6**

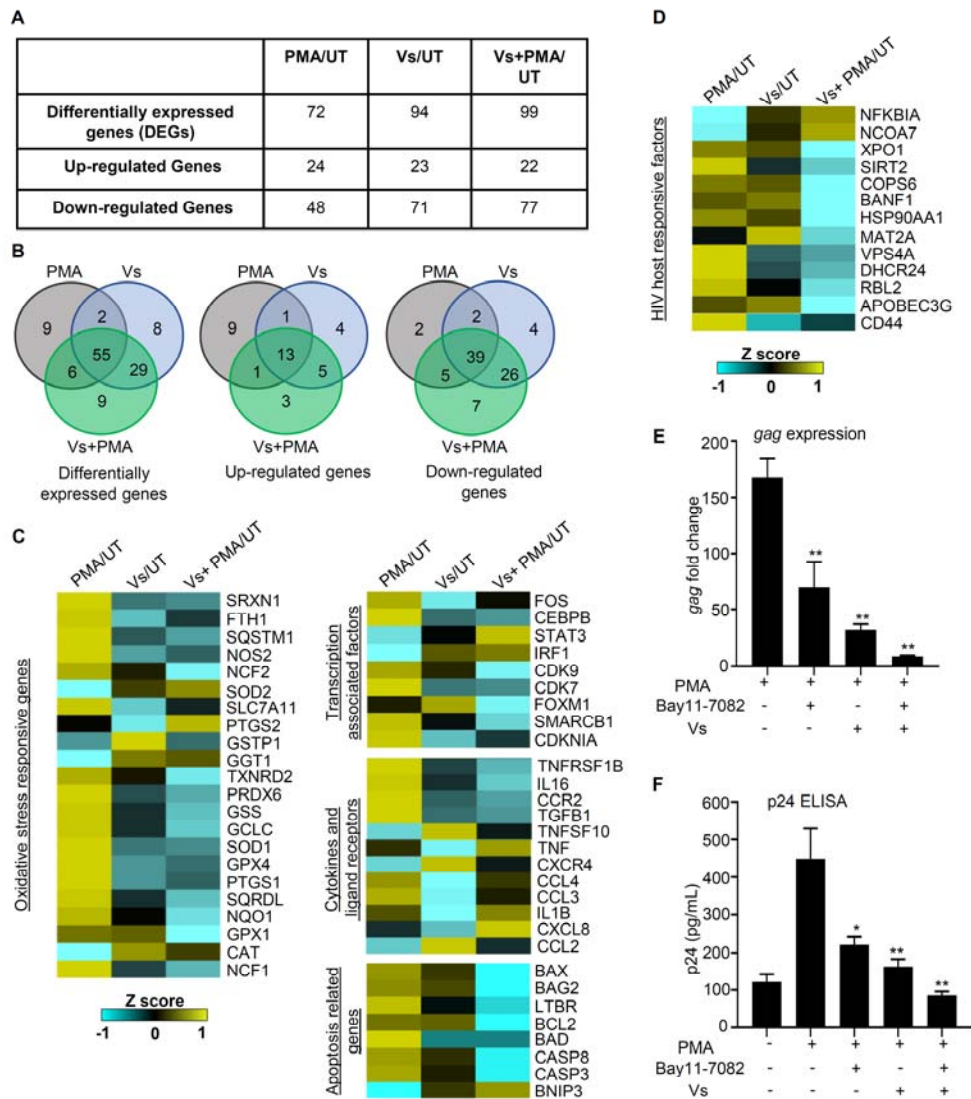

1076

1077

1078 **Figure 6. Expression analysis of host pathways associated with HIV-1**

1079 **activation.** U1 cells were treated with Vs (50 ng/ $\mu$ L) for 15 min, followed by PMA

1080 treatment for 12 h. Total RNA was isolated from untreated (UT), PMA-treated, Vs-

1081 treated and Vs+PMA treated U1 cells and expression analysis of 185 genes specific

1082 to oxidative stress and HIV host response was measured using the NanoString

1083 technology. **(A)** Number of differentially expressed genes (DEGs) under the three

1084 comparison conditions i. PMA/UT, ii. Vs/UT and iii. Vs+PMA/UT. **(B)** The venn  
1085 diagram showing overlap of DEGs significantly perturbed under different comparison  
1086 conditions. **(C and D)** Heat map showing multiple categories of DEGs under  
1087 PMA/UT, Vs/UT and PMA+Vs/UT comparisons. mRNA counts were normalised  
1088 using the internal control  $\beta_2$  microglobulin (B2M), and fold change (FC) was  
1089 calculated using the nSolver 4.0 software. Genes showing an absolute FC >1.5, and  
1090  $P < 0.05$  were considered as significantly altered. **(E and F)** Vs-treated or untreated  
1091 U1 cells were exposed to Bay11-7082 (7.5  $\mu\text{M}$ ). PMA mediated HIV reactivation at  
1092 12 h was monitored by *gag* RT PCR and p24 ELISA. \*\* $P < 0.01$ , \* $P < 0.05$ , by Mann  
1093 Whitney Test. Data are representative of results from three independent experiments  
1094 performed in triplicate (mean  $\pm$  SEM). Asterisks (\*) compare different treatment  
1095 conditions with PMA-treated cells.

1096

1097

1098

1099

1100

1101 **Figure 7**

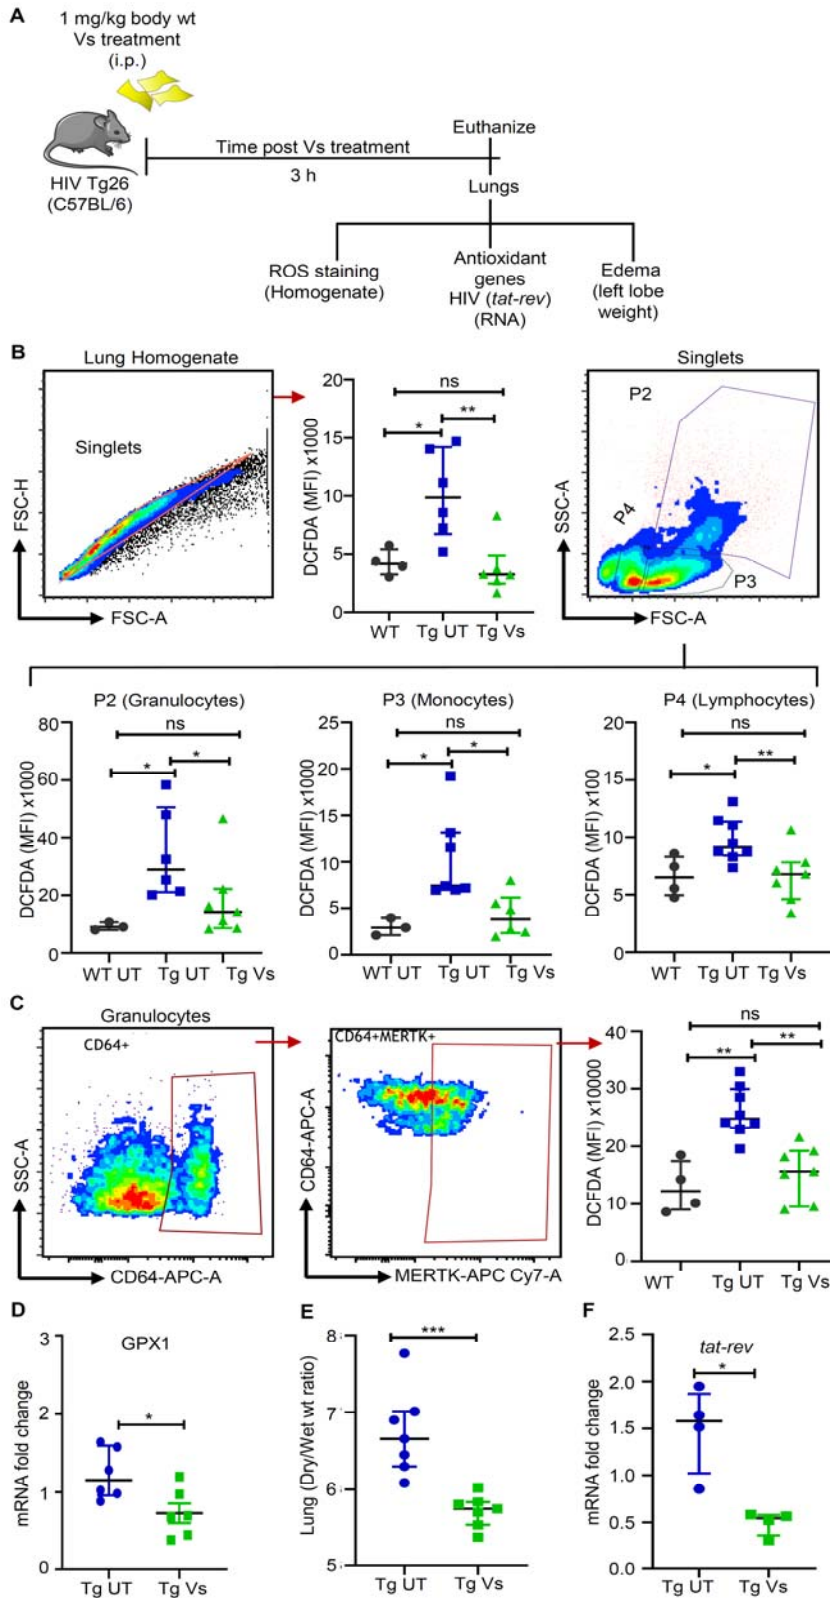

1102

1103 **Figure 7. Vs reduces oxidative stress, edema, and HIV expression *in vivo*. (A)**

1104 Strategy to investigate the antioxidant function of Vs in HIV Transgenic mice, Tg26.

1105 HIV Tg26 (n=8), were left untreated or treated with 1 mg/kg Vs for 3 h. Untreated WT

1106 C57BL/6 was used as a control. **(B)** Lung homogenates were stained with DCFDA

1107 and analysed by flow cytometry for ROS detection. Singlets, followed by different cell

1108 clusters comprising mainly of granulocytes (P2), monocytes (P3) and lymphocytes

1109 (P4) were gated from the whole lung homogenate and ROS levels were plotted as

1110 median fluorescence intensity (MFI). **(C)** Pan-macrophage surface markers, CD64

1111 and MERTK, were used to stain total lung macrophage population, ROS levels were

1112 quantified by DCFDA staining and plotted as MFI.**(D)** RNA was isolated from the

1113 right lung lobe and expression of GPX1 in Tg UT and Tg Vs animals was checked by

1114 qRT-PCR. GPX1 expression values were normalised with Tg UT. **(E)** Lung edema

1115 plotted as the ratio of wet versus the dry weight of left lobe. **(F)** Expression of *tat-rev*

1116 region as a marker for HIV-1 transcription was evaluated by qRT-PCR using RNA

1117 from lungs of Tg UT and Tg Vs animals. Data has been plotted as median  $\pm$

1118 interquartile range. \*\*\* P<0.001, \*\* P<0.01, \* P<0.05, by Mann Whitney Test.

1119

1120

1121

1122

1123

1124

1125

1126

1127

1128 **Supplementary Material**

1129

1130 **List of Supplementary Materials**

1131 Fig. S1. SEM and initial reaction rate for Vanadia Nanowires and crude nanosheets.

1132 Fig. S2. XRD pattern and TEM of Vs

1133 Fig. S3. X-Ray Photoelectron Spectroscopy (XPS) of Vs.

1134 Fig. S4. GR- coupled assay for Vs under varied conditions.

1135 Fig. S5. *In vitro* recycling ability of Vs.

1136 Fig. S6. Survival assay for Vs-treated U1 cells.

1137 Fig. S7. Preparation of Stable cell lines.

1138 Fig. S8. Time dependent induction of Selenium (Se) starvation-mediated oxidative  
1139 stress.

1140 Fig. S9. Antioxidant gene expression in lungs of Vs treated Tg26.

1141 Table S1. List of differentially expressed genes from U1 cells either left Untreated  
1142 (UT), or treated with PMA, Vs or Vs+PMA.

1143 Table S2. List of primers used in the study.

1144 Supplementary Experimental procedures

1145

1146

1147

1148

1149

1150 **Supplementary Figures**

1151

1152 **Figure S1**

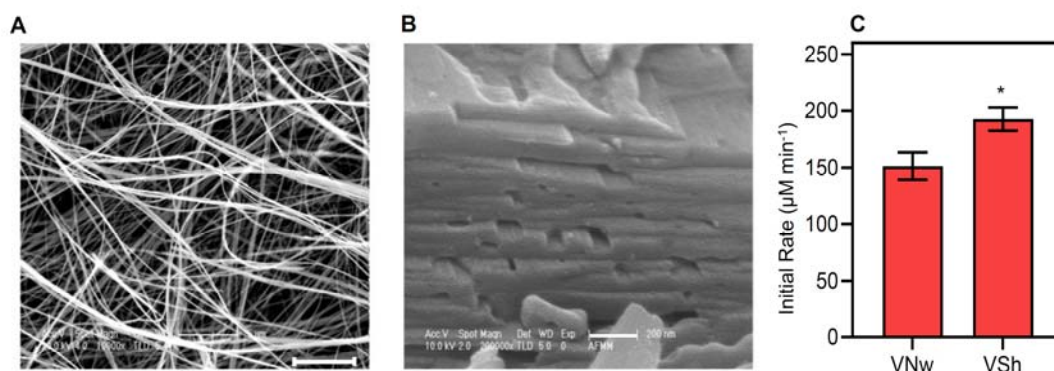

1153

1154 **Figure. S1 SEM and initial reaction rate for Vanadia Nanowires and crude**

1155 **nanosheets.** Scanning electron microscopy (SEM) images of **(A)** nanowires (VNw;

1156 scale – 5 μm) and **(B)** crude nanosheets (VSh; scale – 200nm). **(C)** Bar graph

1157 shows the initial rate of activity for VNw and VSh. \* P<0.05 by Student's *t* test. Data is

1158 representative of three independent experiment (mean ± SD).

1159

1160 **Figure S2**

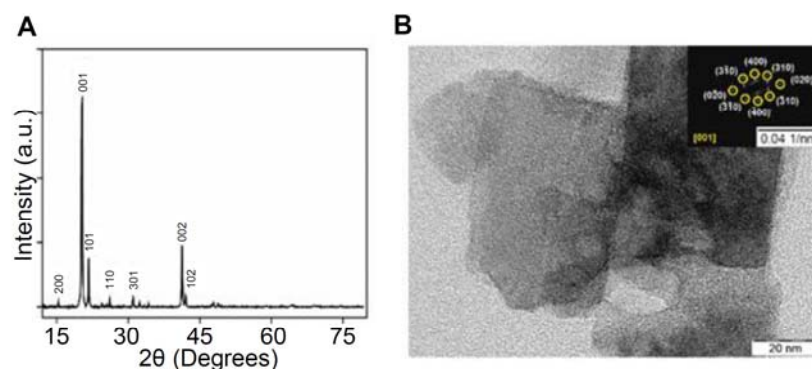

1161

1162 **Figure S2. XRD pattern and TEM of Vs (A) Powder XRD of Vs where all the**

1163 diffraction peaks were indexed to standard V<sub>2</sub>O<sub>5</sub> orthorhombic phase (JCPDS = 41-



1164 1426, space group Pmmn). **(B)** Transmission electron microscopy (TEM) image of  
 1165 Vs thin nanosheets and selected area electron diffraction (SAED) (inset) shows the  
 1166 crystalline nature of the material.

1167

1168 **Figure S3**

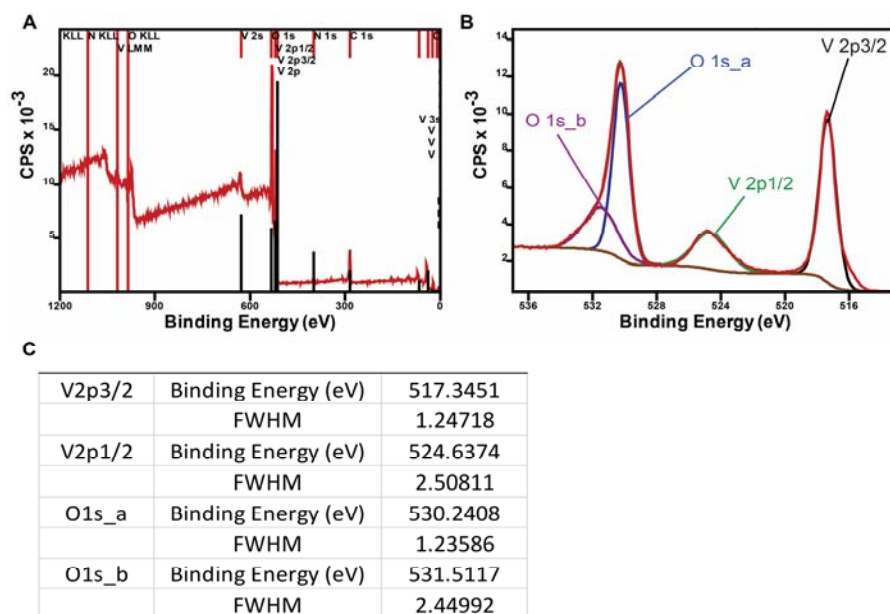

1169

1170 **Figure S3. X-Ray Photoelectron Spectroscopy (XPS) of Vs. (A)** Left: wide spectra  
 1171 and **(B)** right: deconvoluted spectra of oxygen and vanadium peaks. The spectra  
 1172 were calibrated by taking C1s (284.6 eV) as a standard. As described by *Mendialdua*  
 1173 *et al* (81, 82) the difference in binding energies between the O1s core level and the  
 1174 V2p3/2 level ( $\Delta = \text{BE}(\text{O}1\text{s}) - \text{BE}(\text{V}2\text{p}3/2)$ ) was used to determine the oxidation state  
 1175 of  $\text{V}_2\text{O}_5$  nanozymes which confirmed +5 oxidation states of vanadium in Vs. **(C)** Full  
 1176 width half maxima (FWHM) & binding energies of deconvoluted oxygen and  
 1177 vanadium XPS peaks.

1178

1179 **Figure S4**

1180



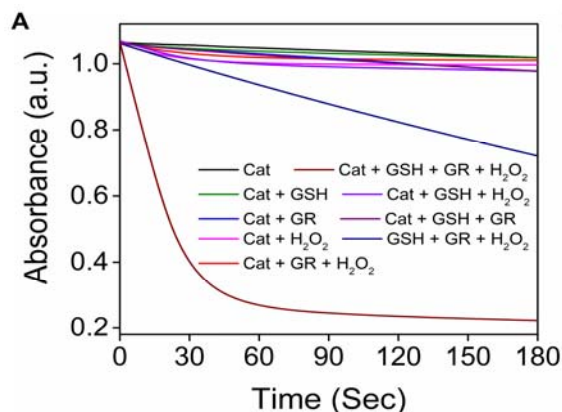

1181

1182

1183 **Figure S4. GR- coupled assay for Vs under varied conditions. (A)** The decrease  
 1184 in absorbance of NADPH (0.2 mM under different assay conditions were monitored  
 1185 during GR coupled assay.

1186

1187 **Figure S5**

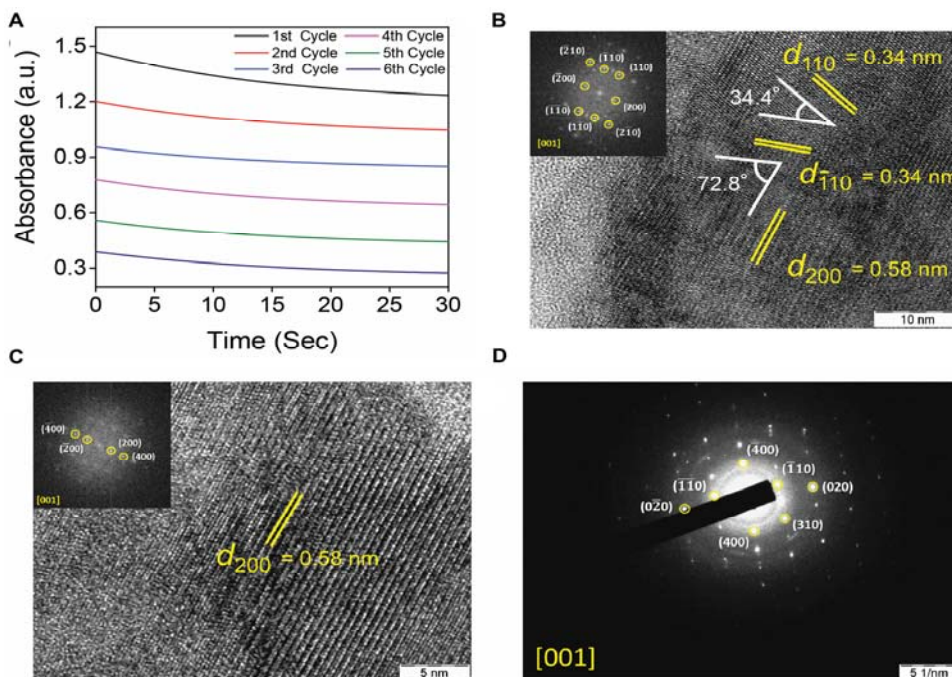

1188

1189

1190 **Figure S5. *In vitro* recycling ability of Vs. (A)** Recycling activity of Vs during  
 1191 multiple rounds of catalysis was analysed by addition of fresh substrates in the

1192 reaction mixture up to six cycles. The curves observed due to reduction in NADPH  
1193 absorbance, for every cycle were parallel to each other, indicating no change in their  
1194 initial rate and persistence of the activity. This clearly depicts robustness of the  
1195 catalyst. Conditions used for the assay was sodium phosphate buffer (100 mM, pH  
1196 7.4), GSH (2 mM), NADPH (0.2 mM), catalyst (20 ng/ $\mu$ L), GR (~1.7 U) and H<sub>2</sub>O<sub>2</sub> (20  
1197  $\mu$ M) at 25°C. High Resolution TEM (HRTEM) image and FFT patterns of Vs before  
1198 **(B)** and after **(C)** catalysis. **(D)** SAED pattern of Vs after catalysis. The pattern was  
1199 indexed in a common zone axis [001] which indicates the surface exposed facets are  
1200 retained after multiple rounds of catalysis.

1201

## 1202 **Figure S6**

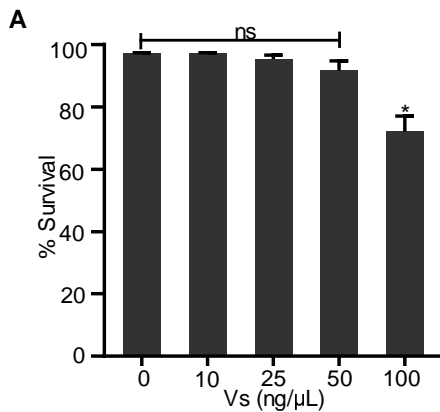

1203

1204 **Figure S6. Survival assay for Vs-treated U1 cells. (A)** U1 cells were treated with  
1205 increasing concentrations of Vs – 10 to 100 ng/ $\mu$ L for 15 min and cell survival was  
1206 analysed flow cytometrically after 24 h by propidium iodide (PI) staining. Experiment  
1207 is representative of two independent experiments done in triplicate (mean  $\pm$  SD).

1208 \*P<0.05, by Mann Whitney test.

1209

## 1210 **Figure S7**

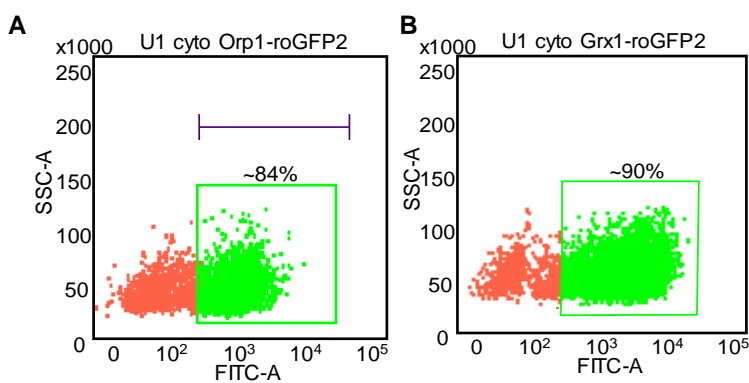

1211

1212 **Figure S7. Preparation of Stable cell lines.** Dot plot validating the stable  
1213 expression of the biosensors in **(A)** U1 cyto-Orp1-roGFP2 and **(B)** U1 cyto-Grx1-  
1214 roGFP2 cell lines.

1215

1216 **Figure S8**

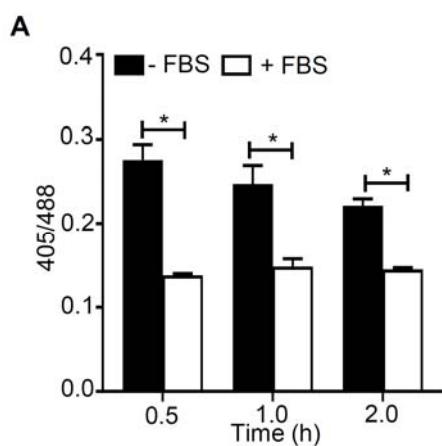

1217

1218 **Figure S8. Time dependent induction of Selenium (Se) starvation-mediated**  
1219 **oxidative stress. (A)** U1-Grx1-roGFP2 cells were cultured in serum free medium (to  
1220 deplete Se) for various time periods and biosensor response was measured by flow  
1221 cytometry. N=2. Data is representative of two experiments done in duplicates (mean  
1222  $\pm$  SEM). \* P<0.05, by Mann Whitney test.

1223

1224 **Figure S9**

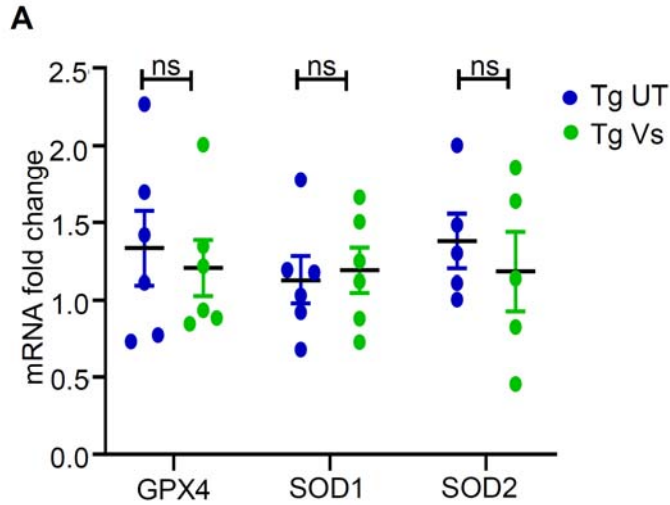

1225

1226 **Figure S9. Antioxidant gene expression in lungs of Vs treated Tg26. (A)** Tg26

1227 mice were left untreated or treated with 1 mg/kg of Vs for 3 h. RNA was isolated from

1228 the right lung lobe, reverse transcribed and expression levels of GPX4, SOD1 and

1229 SOD2 in Tg UT and Tg Vs animals were analysed. Values were normalised with Tg

1230 UT. n=6, ns=non-significant.

1231

1232 **Supplementary Table**

1233 **Table S2**

| Primers for qRT-PCR    |                |         |                                     |
|------------------------|----------------|---------|-------------------------------------|
| Organism               | Gene           |         | Primer Sequence                     |
| HIV-1                  | p24            | Forward | 5'-ATAATCCACCTATCCCAGTAGGAGAAAT-3'  |
|                        |                | Reverse | 5'-TTGGTTCC TTGTCTTATGTCCAGAATGC-3' |
|                        | tat-rev        | Forward | 5'- TGG AAGCATCCAGGAAGTCAGCC-3'     |
|                        |                | Reverse | 5'-TTCCTCTCTATTTCCTTCGGGCC-3'       |
| <i>Homo sapiens</i>    | $\beta$ -Actin | Forward | 5'-ATGTGGCCGAGGACTTTGATT-3'         |
|                        |                | Reverse | 5'-AGTGGGGTGGCTTTTAGGATG-3'         |
| <i>Mus musculus</i>    | GPX1           | Forward | 5'-GGTTCGAGCCCAATTTTACA-3'          |
|                        |                | Reverse | 5'-CCCACCAGGAACCTCTCAAA-3'          |
|                        | GPX4           | Forward | 5'-CTCCATGCACGAATTCTCAG-3'          |
|                        |                | Reverse | 5'-ACGTCAGTTTTGCCTCATTG-3'          |
|                        | SOD1           | Forward | 5'-CAGAAGGCAAGCGGTGAA-3'            |
|                        |                | Reverse | 5'-CAGCCTTGTGTATTGTCCCATA-3'        |
|                        | SOD2           | Forward | 5'-GACCTGCCTTACGACTATGG-3'          |
|                        |                | Reverse | 5'-GACCTTGCTCCTTATTGAAGC-3'         |
|                        | $\beta$ -ACTIN | Forward | 5'-GCAAGCAGGAGTACGATGAG-3'          |
|                        |                | Reverse | 5'-CCATGCCAATGTTGTCTCTT-3'          |
| Primers for Genotyping |                |         |                                     |
|                        | Tg26 F18296    | Forward | 5'-TCCAGTTTGAAAGGACCAG-3'           |
|                        | Tg26 F18297    | Reverse | 5'-TTGCCACACAATCATCACCT-3'          |
|                        | Int Ct F21157  | Forward | 5'-CTCCCAACCCAGAGGTAGT-3'           |
|                        | Int Ct F21225  | Reverse | 5'-AGACCCAGATCCAGAAAGG-3'           |

1234

1235 **Table S2 List of primers used in the study.**

1236

1237 **Supplementary Materials and Methods**

1238

1239 **Dispersion of V<sub>2</sub>O<sub>5</sub> NPs**

1240 V<sub>2</sub>O<sub>5</sub> NPs were dispersed in sterile water at a concentration of 2 mg/mL. The  
 1241 dispersion was carried out by sonication using probe sonicator under the following  
 1242 conditions: time – 5 min, amplitude – 5 sec ON, 5 sec OFF. After dispersion, the  
 1243 vanadia NPs form a yellowish colloidal solution.

1244

1245 **Treatment of cell lines with Vs**

1246 Indicated cell lines were treated with different concentrations of Vs at a cell  
1247 density of  $0.2 \times 10^6$  cells/mL for 15 min at 37°C in a CO<sub>2</sub> incubator. Following Vs  
1248 treatment, the cells were washed and re-suspended in complete medium for further  
1249 culturing or in FACS buffer (1× PBS + 3% FBS) for measuring the antioxidant  
1250 response by flow cytometry, as required. For experiments with J1.1, Jurkat, or CEM-  
1251 GFP cell lines, which required long term culturing, Vs treatment was repeated every  
1252 24 h, as mentioned above.

1253

#### 1254 **Internalization of Vs by U1**

1255 U1 cells were treated with 50 ng/μL as mentioned above. The cell pellet was  
1256 re-suspended in 10 mL of dilute nitric acid (HNO<sub>3</sub>; 3 N) and incubated for 16 h to  
1257 remove cellular organic matter. The samples are analysed by ICP-AES (inductively  
1258 coupled plasma atomic emission spectroscopy) and their vanadium (V) content was  
1259 estimated in parts per billion (ppb). The ppb content of vanadium sulphate treated  
1260 parallelly with HNO<sub>3</sub> was used as a standard to estimate the cellular V content.

1261

#### 1262 **Mammalian and bacterial Cell Culture**

1263 The human monocytic cell line U937, CD4<sup>+</sup> T lymphocytic cell line Jurkat  
1264 (ATCC, Manassas, VA), the chronically infected U1 and J1.1, and CD4<sup>+</sup> reporter T  
1265 cell line, CEM-GFP (AIDS Research and Reference Reagent program, NIH, USA)  
1266 were grown in RPMI 1640 (Cell Clone), with 10% FBS (MP Biomedicals) and 2 mM  
1267 L-glutamine (MP Biomedicals) supplementation. Vs treatment, transfection, and HIV-  
1268 1 infection was carried out in Opti MEM media (Hyclone). Differentiation and HIV  
1269 activation in U1 cells were carried out by treatment with 5 ng/mL of phorbol ester  
1270 PMA (Sigma) or 1.25 μM prostratin (Sigma). Laboratory strain of *Mtb* H37Rv and

1271 clinical isolate JAL2287 (MDR) were cultured in 7H9 (liquid) or 7H11 (solid) synthetic  
1272 medium supplemented with 0.4% glycerol, 0.1% tween-80 and 10% albumin-  
1273 dextrose-sodium chloride (ADS) or 0.4% glycerol and 10% oleic acid-albumin-  
1274 dextrose-catalase (OADC), respectively.

1275

#### 1276 **Preparation of Stable Cell lines and validation using flow cytometry**

1277 Various cell lines stably expressing the cytosolic biosensor Grx1-roGFP2 or  
1278 Orp1-roGFP2 were prepared by electroporation of  $10 \times 10^6$  U1 cells with 5  $\mu$ g of the  
1279 pMSCVpuro-Grx1-roGFP2 or pMSCVpuro-Orp1-roGFP2 constructs, followed by  
1280 selection on 350 ng/mL puromycin. The ratiometric responses of the biosensors  
1281 were measured by excitation at 405 and 488 nm, and recording emission at 510/10  
1282 nm, using BD FACSVerser flow cytometer (BD Biosciences). The data were analysed  
1283 using FACSuite software (BD Biosciences).

1284

#### 1285 **Assessment of Vs antioxidant activity and redox potential measurement**

1286  $0.1 \times 10^6$  untreated and Vs treated U1-Orp1-roGFP2 or U1-Grx1-roGFP2 cells  
1287 were exposed to increasing concentrations of  $H_2O_2$  - 50 and 100  $\mu$ M or 50, 100 and  
1288 200  $\mu$ M, respectively- and incubated at RT for 2-3 min. These cells were analysed by  
1289 flow cytometry at excitation of 405 nm (V500) and 488 nm (FITC), while the emission  
1290 was fixed at 510 nm. Ratio of fluorescence intensities at 405/488 was calculated and  
1291 normalized using a cell permeable oxidant  $H_2O_2$  or the reductant DTT to calculate  
1292 the responsiveness of both the biosensors.

1293 Intracellular redox potential was measured for cells expressing the Grx1-  
1294 roGFP2 biosensor, as mentioned earlier (15). Briefly, for each experiment, 100%  
1295 biosensor oxidation or reduction corresponding to maximal and minimal fluorescence

1296 intensity ratios was determined by treatment with 10 mM H<sub>2</sub>O<sub>2</sub> and 10 mM DTT,  
1297 respectively. The observed ratios were used to determine the degree of biosensor  
1298 oxidation and ultimately equated in a modified form of the Nernst equation to obtain  
1299 the intracellular glutathione redox potential ( $E_{GSH}$ ).

1300

### 1301 **Propidium iodide (PI) staining**

1302 U1 cells were treated with increasing concentrations of Vs for 15 min and  
1303 cultured in complete RPMI medium for 24 h. After 24 h, cells were washed,  
1304 suspended in 1× PBS, and stained with 3 μM PI for 15 min in the dark. After washing  
1305 twice with 1× PBS, cells were analyzed on a flow cytometer using the phycoerythrin  
1306 (PE) detector (575/26 nm) by excitation at 488 nm.  
1307 emission.

1308

### 1309 **HIV reactivation in U1 cells and qRT-PCR analysis**

1310 U1 cells were treated with either 5 ng/mL PMA or 1.25 μM prostratin and  
1311 incubated at 37°C in a CO<sub>2</sub> incubator. Samples were harvested at 6 h, 12 h, and 24  
1312 h post-activation, and RNA was isolated using the Qiagen RNAeasy kit  
1313 (manufacturer's protocol). cDNA was synthesized using 400 ng RNA by the Biorad  
1314 iScript cDNA synthesis kit. qRT-PCR was performed using primers against *gag*  
1315 transcript (a marker for HIV reactivation). Actin was used as an internal control. To  
1316 inhibit NF-κB pathway, untreated or Vs-treated cells were exposed to 7.5 μM Bay11-  
1317 7082 (TCI chemicals) for 12 h.

1318

### 1319 **p24 detection by Immunoblotting and ELISA**



1320 Untreated or Vs treated HIV-infected Jurkat cells were harvested at 36, 48,  
1321 and 72 h post infection. Cells were lysed in 300  $\mu$ L of passive lysis buffer (Promega)  
1322 supplemented with 1 $\times$ protease inhibitor cocktail (Roche). Protein was quantified  
1323 using Pierce™ BCA Protein Assay Kit (Thermo Fisher Scientific). 50  $\mu$ g of whole cell  
1324 lysate (WCL) was mixed with Laemmli buffer, heated at 95°C for 5 min, and was  
1325 separated on a 12% SDS PAGE gel. Immunoblotting was performed using primary  
1326 antibodies against HIV-p24 (Abcam; ab9071) and GAPDH (CST; D4C6R) as an  
1327 internal control. Horse anti-mouse IgG (CST; 7076) was used as the secondary  
1328 antibody. For ELISA, we collected supernatant from Jurkat cells infected with HIV at  
1329 24, 48, and 72 hpi. p24 levels were determined by sandwich ELISA using the J.J.  
1330 Mitra's kit as per the manufacturers' instructions. Standard curve was prepared with  
1331 known amount p24 and utilised for calculating the viral p24 concentration in the  
1332 medium.

1333

#### 1334 **Bacterial Survival assays in U1 cells**

1335 For survival experiments of *Mtb* H37Rv and JAL2287 strains in U1 cell lines,  
1336 the cells were differentiated with 5 ng/mL of PMA for 18 h. Differentiated U1  
1337 macrophages were either left untreated or treated with 50 ng/ $\mu$ L of Vs for 15 min,  
1338 washed, and allowed to rest for 2 h. H37Rv and JAL2287 were opsonized in 50%  
1339 horse serum for 1 h. Untreated or Vs treated U1 cells were infected at moi 2 for 4 h.  
1340 After 4 h of incubation, extracellular bacilli were killed by treatment with 0.2 mg/mL  
1341 amikacin for 1 h. The infected cells were washed three times with 1 $\times$  PBS and then  
1342 cultured in complete RPMI media for 24 h. The infected cells were lysed in 0.06%  
1343 sodium dodecyl sulphate (SDS) and plated on 7H11 plates supplemented with 10%  
1344 OADC. Bacterial survival was assessed 24 h post infection by enumerating colony  
1345 forming units (CFUs) on agar media. The initial bacterial burden was determined by

1346 plating at 0 h post infection and the percentage increase in bacterial survival was  
1347 plotted.

#### 1348 **Isolation and infection of primary CD4<sup>+</sup> T cells**

1349       Peripheral blood mononuclear cells (PBMCs) were isolated using Ficoll-  
1350 Paque-based density gradient centrifugation from blood samples of healthy donors,  
1351 donated after informed consent, approved by the IISc Ethical Committee. Primary  
1352 CD4<sup>+</sup> T cells were purified from PBMCs using an EasySep human CD4<sup>+</sup> T cell  
1353 isolation kit (Stem Cell Technologies, Canada) and cultured for 3 days after isolation  
1354 at 37°C in 5% CO<sub>2</sub> in complete media containing RPMI 1640 supplemented with  
1355 10% FBS, 100 U/mL interleukin-2 (IL-2) (Peprotech, London, United Kingdom)  
1356 (specific activity, 10 U/ng), and 1\_μg/mL phytohemagglutinin (PHA) (Thermo Fisher  
1357 Scientific). Subsequently, 250,000 activated primary CD4<sup>+</sup> T cells, were pre-treated  
1358 with 25 ng/μL Vs for 15 min and infected with 0.1 moi pNL4.3 virus by spinoculation  
1359 at 1000 g for 90 min at 32°C. Cells were then washed and replenished with complete  
1360 media containing 100 U/mL IL-2. Vs treatment was repeated every 48 h. To quantify  
1361 the virion release, supernatant was harvested from infected cells and centrifuged at  
1362 400 g for 10 min and virus concentration was estimated by HIV-1 p24 ELISA.

1363

#### 1364 **Animal experiments**

1365       Heterozygous HIV transgenic mouse Tg26 containing HIV proviral DNA with  
1366 mutated 3 kb region of *gag* and *pol* genes was used (64). In order to create a more  
1367 stable line, the HIV Tg26 (FVB/N) was backcrossed with C57BL/6 for eight  
1368 generations to create the current Tg26 by Dr. Roy L. Sutliff (Veterans Affairs Medical  
1369 Center, Emory University, Atlanta, GA). HIV Tg26 breeding colony was maintained in  
1370 the BSL3 animal facility at CIDR, IISc, according to the guidelines set by Institutional

1371 Animal Ethical Committee. Genotyping was done at 4 weeks of age by tail vein PCR.  
1372 6-9 weeks old sex-matched transgenic mice were used for the experiment. Wild type  
1373 (*Wt*) littermates were used as controls. 1 mg/kg body weight Vs was administered by  
1374 intra-peritoneal injection in Tg26 treatment group. Control and treated animals were  
1375 euthanized at 3 h post Vs treatment.

1376

### 1377 **Pulmonary edema analysis**

1378 Left lobe of the lungs from 8 mice in each group- untreated C57BL/6 Tg26  
1379 and Vs treated Tg26 were removed aseptically and weighed in 1.5 mL microfuge  
1380 tubes. The lungs were left for 16-24 h in a dry oven at 55°C for desiccation and the  
1381 dry weight of the tissue was recorded. The ratio of lung wet weight to dry weight was  
1382 plotted for each group.

1383

### 1384 **ROS staining of lung homogenates**

1385 Untreated WT, untreated Tg26, and Vs treated Tg26 mice were euthanized at  
1386 3 h post Vs treatment and a portion of the right lobe of the lung was aseptically  
1387 removed. Single cell suspensions for lung homogenates were prepared for DCFDA  
1388 staining and flow cytometry analysis as per an earlier study (73). Briefly, the tissue  
1389 was minced and digested in serum free RPMI containing 0.2 mg/mL Liberase DL  
1390 and 0.1 mg/mL DNase I for 60 min at 37°C and agitation at 180 rpm. The minced  
1391 tissue was mechanically disrupted using GentleMACS tissue dissociator to obtain a  
1392 finer suspension. Larger cell clumps were removed by passing the suspension  
1393 through a 40 µm cell strainer (BD Falcon). Red blood cells were removed by  
1394 incubating the cells in RBC lysis buffer.

1395

1396 **qRT-PCR analysis from animal tissues**

1397 RNA was isolated from a part of the right lobe of the lungs using Trizol  
1398 reagent (Ambion). 1 µg RNA was reverse transcribed using the Biorad iScript cDNA  
1399 synthesis kit. qRT-PCR was performed using primers against GPX1, GPX4, CAT,  
1400 SOD1, and SOD2 to assess the host antioxidant response under different treatment  
1401 groups. β-Actin was used as an internal control.

1402
